18 **DO mice host-microbiome associations**

19 **KEYWORDS:** Diversity Outbred mice; Microbiome; QTL mapping

20 <sup>1</sup>Corresponding authors: AGC or FS, Cornell University, Biotechnology Building 227,  
21 526 Campus Rd, Ithaca NY 14853. E-mail: ac347@cornell.edu, mfs97@cornell.edu

22 **ABSTRACT**

23 The composition of the gut microbiome is impacted by a complex array of factors, from  
24 nutrient composition and availability, to physical factors like temperature, pH, and flow  
25 rate, as well as interactions among the members of the microbial community. Many of  
26 these factors are affected by the host, raising the question of how host genetic variation  
27 impacts microbiome composition. Though human studies confirm this type of role for  
28 host genetics, its overall importance is still a subject of debate and remains difficult to  
29 study. The mouse model, by allowing the strict control of genetics, nutrition, and other  
30 environmental factors, has provided an excellent opportunity to extend this work, and  
31 the Diversity Outbred (DO) mice in particular present a chance to pinpoint host genetic  
32 variants that influence microbiome composition at different levels of generality. Here, we  
33 apply 16S rRNA gene sequencing to fecal samples of 247 DO male mice to estimate  
34 heritability and perform taxon-specific QTL mapping of microbial relative abundances  
35 revealing an increasingly heterogeneous picture of host function and microbial taxa at  
36 the host-microbiome interface. We present the first report of significant heritability of  
37 phylum Tenericutes in mice, and find novel QTL-spanning genes involved in  
38 antibacterial pathways, immune and inflammatory disease, and lipid metabolism.

## 39 INTRODUCTION

40 The gastrointestinal tract of all vertebrates, including humans, harbors a complex  
41 ecological community of highly diverse microbes referred to as the gut microbiota. The  
42 microbiota colonizes the gut for the first time during the birth of the host, and its  
43 composition is influenced by many factors during the host's life such as disease, diet,  
44 and antibiotics (FRANCINO 2016; BATTAGLIOLI AND KASHYAP 2018; DUDEK-WICHER *et al.*  
45 2018; DASH *et al.* 2019). Variation in the human gut microbiome composition has also  
46 already been associated with host immune responses (ROUND AND MAZMANIAN 2009;  
47 GARRETT *et al.* 2010; VEIGA *et al.* 2010), metabolic phenotypes (TURNBAUGH *et al.* 2009;  
48 RIDAURA *et al.* 2013), and diseases such as obesity (LEY *et al.* 2005), heart disease  
49 (FAVA *et al.* 2006), and diabetes (WEN *et al.* 2008). Given the roles of the gut  
50 microbiome in complex human diseases, it is important to characterize the factors that  
51 impact microbiome composition.

52 While it is clear that the gut microbiome composition is strongly impacted by  
53 environmental exposures (ROTHSCHILD *et al.* 2018), the role of host genetics has only  
54 recently been implicated (GOODRICH *et al.* 2014; BLEKHMANN *et al.* 2015; GOODRICH *et al.*  
55 2016). Studies have identified multiple genetic variants significantly associated with  
56 specific bacterial taxon abundances (DAVENPORT *et al.* 2015; BONDER *et al.* 2016;  
57 TURPIN *et al.* 2016; WANG *et al.* 2016; GOODRICH *et al.* 2017; IGARTUA *et al.* 2017;  
58 ROTHSCHILD *et al.* 2018) despite the observation that generally the primary determinants  
59 of microbiome composition are non-genetic (ROTHSCHILD *et al.* 2018). The relationship  
60 between genetic and non-genetic determinants is complex, as in the case of diet, which  
61 can influence the variability of complex traits by reshaping the gut microbiome

62 (VOROBYEV *et al.* 2019). Overall, it is clear that host-microbiome relationships are  
63 impacted by interactions between genetics and environment to drive both community  
64 composition and host traits (KURILSHIKOV *et al.* 2020). Human genetic studies have  
65 significant limitations for accurate assessment of genetic effects on the microbiome,  
66 including accessibility to large and diverse sample populations as well as a general lack  
67 of control over confounding variables like diet, thus only detecting the strongest genetic  
68 effects. This lack of experimental control can be circumvented through studies in model  
69 organisms, which would allow us to better characterize host-microbiome relationships  
70 and increase our chances of identifying genetic effects.

71 The mouse model, with the ability to control diet, provides a better opportunity to  
72 dissect genetic and environmental factors impacting microbiome composition and has  
73 been successful in this endeavor using inbred strains. Quantitative trait locus (QTL)  
74 mapping efforts show that gut microbiota composition is a polygenic trait, with clearly  
75 mappable genetic factors influencing the gut microbiome composition (BENSON *et al.*  
76 2010; MCKNITE *et al.* 2012; SNIJDERS *et al.* 2016). Standard QTL mapping approaches  
77 have low mapping resolution, however, and advanced intercross lines provide one  
78 excellent means of improving mapping resolution. BELHEOUANE *et al.* (2017) performed  
79 genetic and 16S rRNA gene analysis of skin microbiomes of a collection of 15-  
80 generation advanced intercross lines, and demonstrated that the improved mapping  
81 resolution also improved the specificity and significance of genetic associations. It is  
82 clear that the mouse model will provide further opportunities to dissect the means by  
83 which the host genome can modulate microbiome composition. A logical next step is a

84 mapping experiment to identify portions of the genome that influence functional  
85 pathways that modulate the microbiome.

86 Here we extend the analysis of the link between the host genome and microbiome  
87 using the Diversity Outbred mouse model. The Diversity Outbred (DO) population is a  
88 heterogeneous mouse stock derived from the same eight progenitor lines (A/J,  
89 C57BL/6J, 129S1/SvImJ, NOD/ShiLtJ, NZO/HILtJ, CAST/EiJ, PWK/PhJ, and WSB/EiJ)  
90 used to establish the Collaborative Cross (CC) (COLLABORATIVE CROSS CONSORTIUM  
91 2012). Mice from the CC lines at early stages of inbreeding were used to establish the  
92 DO population, which is maintained by randomized outbreeding among 175 mating  
93 pairs. The result is each individual DO mouse represents a unique combination of  
94 segregating alleles drawn from the original eight progenitor lines. The advantages of  
95 this outbreeding include normal levels of heterozygosity — similar to the human genetic  
96 condition — and substantially increased genetic resolution (CHURCHILL *et al.* 2012). Both  
97 the DO mice and their founder progenitor lines have already proven to be successful in  
98 identifying genetic associations with intestinal microbiome composition (O'CONNOR *et al.*  
99 2014, KEMIS *et al.* 2019).

100 In this study, motivated by the high level of environmental control of the laboratory  
101 mouse and the improved mapping resolution of the Diversity Outbred mouse system,  
102 we identified genetic underpinnings of the gut microbiota of 247 Diversity Outbred mice.  
103 We uncover evidence of host genetic factors influencing the composition of many  
104 specific attributes of the gut microbiome (**Figure 1**). These included not only  
105 associations between specific host genetic variants and abundances of particular  
106 bacterial taxa, but also associations with functional molecular pathways.

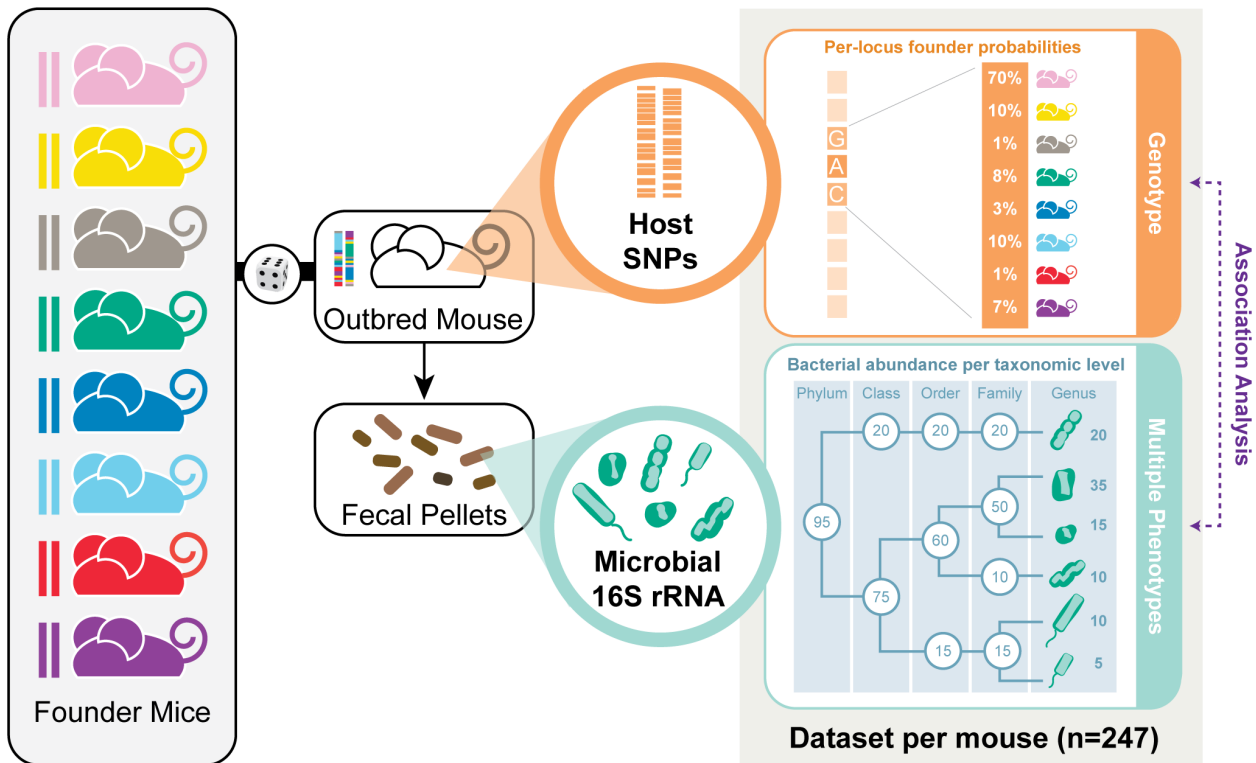

107

108 **Figure 1. Data flow schematic.** Each of the 247 mice in this study represents a unique combination of  
 109 segregating alleles, whose genome is a unique sampling from the original eight progenitor lines (founder  
 110 mice). The SNP genotype of each mouse is represented by an eight-founder state probability. Microbial  
 111 16S rRNA from fecal pellets from each DO mouse provided bacterial relative abundances, which were  
 112 aggregated at each taxonomic level and used as separate phenotypes/traits.

## 113 MATERIALS AND METHODS

### 114 ***Animal population and sample collection***

115 Male mice from the Diversity Outbred Mouse Panel were obtained from The  
116 Jackson Laboratory (Bar Harbor, ME, USA) at 6 weeks of age. Experiments were  
117 performed at the University of Pennsylvania, Center for Sleep. Mice were group-housed  
118 (5 animals per cage) for 2 weeks of post-travel acclimation, and then single-housed at  
119 identical conditions with lights on/lights off at 7:00 AM/7:00 PM with a lux level of 60 and  
120 temperature 23-25°C. Bedding used in home cages was Bed-o Cobs 1/8" (The  
121 Andersons Inc., Maumee, OH). Mice were fed *ad libitum* Laboratory Autoclavable  
122 Rodent Diet 5010 (Lab Diet, St. Louis, MO). Fecal pellets from 249 mice were collected  
123 at 3 months old (two samples were later discarded, leaving a final analyzed dataset of  
124 247 mice). The pellets were collected from the mouse cage at 10:00 AM, i.e., 3 hours  
125 after lights on. Pellets were stored in Eppendorf tubes placed on dry ice and moved to a  
126 -80°C freezer until shipping and processing at Cornell University (Ithaca, NY, USA).

### 127 ***Microbial DNA extraction, 16S rRNA gene PCR, and sequencing***

128 Microbial community DNA was extracted from one single frozen pellet per sample  
129 using the MO BIO PowerSoil-htp DNA Isolation Kit (MO BIO Laboratories, Inc., cat #  
130 12955-4), but instead of vortexing, samples were placed in a BioSpec 1001 Mini-  
131 Beadbeater-96 for 2 minutes. We used 10-50 ng of sample DNA in duplicate 50 µl PCR  
132 reactions with 5 PRIME HotMasterMix and 0.1 µM forward and reverse primers. We  
133 amplified the V4 region of 16S rRNA gene using the universal primers 515F and  
134 barcoded 806R and the PCR program previously described CAPORASO *et al.* (2011), but

135 with 25 cycles. We purified amplicons using the Mag-Bind® E-Z Pure Kit (Omega Bio-  
136 tek, cat # M1380) and quantified with Invitrogen Quant-iT™ PicoGreen® dsDNA  
137 Reagent, and 100 ng of amplicons from each sample were pooled and paired end  
138 sequenced (2x250bp) in two separate sequencing runs on an Illumina MiSeq instrument  
139 at Cornell Biotechnology Resource Center Genomics Facility.

#### 140 **16S data processing**

141 We performed demultiplexing of the 16S rRNA gene sequences and OTU picking  
142 using the open source software package Quantitative Insights Into Microbial Ecology  
143 (QIIME) version 1.9.0 with default methods (CAPORASO *et al.* 2010). The total number of  
144 sequencing reads was 15,149,384, with an average of 61,334 sequences per sample  
145 and ranging from 17,658 to 135,803. Open-reference OTU picking at 97% identity was  
146 performed against the Greengenes 8\_13 database. 12% of sequences failed to map in  
147 the first step of closed-reference OTU picking. The taxonomic assignment of the  
148 reference sequence was used as the taxonomy for each OTU. 'NR' within taxa names  
149 represents New Reference OTUs defined as those with sequences that failed to match  
150 the reference and are clustered *de novo*. Random subsamples were used to create a  
151 new reference OTU collection and 'NCR' represents New Clean-up Reference OTUs  
152 that failed to match the new reference OTU collection (RIDEOUT *et al.* 2014).

153 For the non-rarefied data, read count was used as an additional covariate during  
154 QTL mapping to reduce the effect of sequencing depth. A rarefied dataset was also  
155 used for heritability estimates and QTL mapping, as explained in **File S1**. Two extreme  
156 outliers were omitted from further analysis, yielding a total of 247 samples. To



157 differentiate the non-rarefied taxa from the rarefied taxa, we use 'NonR' to represent the  
158 non-rarefied dataset and 'R' to represent the rarefied dataset.

159 For heritability estimates and QTL mapping, a filter was applied across all 247  
160 samples that removed any taxon that was not present in more than 50% of the samples.  
161 Relative abundance of reads (number of reads clustered to each taxa divided by the  
162 total number of reads in a given sample) was used as the tested phenotype. Relative  
163 abundances were rank Z-score transformed using R-package *DOQTL* (GATTI *et al.*  
164 2014).

165 Stacked bar plots of the most abundant taxa within each taxonomic level were  
166 plotted with R-package *ggplot2*. A box-plot was first generated for each taxonomic level  
167 depicting the relative abundances of the taxa within that taxonomic level across the 247  
168 samples (**Figure S1**). The top ten taxa with the highest average relative abundances  
169 are selected to be plotted in the stacked bar plot, ordered by the most abundant taxon.  
170 A heatmap that correlates similarities between taxa from the non-rarefied and rarefied  
171 datasets based on the Pearson correlation coefficient was plotted using the R-package  
172 *corrplot* (**Figure S3**).

## 173 **SNP genotyping**

174 SNP genotyping was done at the Jackson Laboratories on each of the 247 mice  
175 using The Mega Mouse Universal Genotyping Array (MegaMUGA). A total of 57,973  
176 SNPs passed QC metrics and were used in the heritability and mapping analysis  
177 reported here.

## 178 **Heritability estimation**

179 Heritabilities of the various bacterial taxa were quantified and calculated on  
180 autosomes using a linear mixed model as implemented in R-package *lme4qtl* via the  
181 `relmatLmer()` function (ZIYATDINOV *et al.* 2018) (<https://github.com/variani/lme4qtl>). This  
182 linear mixed model enables us to decompose variability into genetic and environmental  
183 components. The variance of the genetic component is expected to be  $\sigma_g^2 K$ , where  $K$  is  
184 a kinship matrix normalized as proposed in (KANG *et al.* 2010). The kinship matrix is  
185 specified via the “relmat” argument in `relmatLmer()`. To account for the potentially  
186 confounding effects of shared cages during acclimation (as noted above under **Animal**  
187 **population and sample collection**), we also included cage as a random effect in our  
188 model. Thus, the model included estimates of variance of the genetic component ( $\sigma_g^2$ )  
189 and the cage component ( $\sigma_{cage}^2$ ), and the residual variance due to unspecified  
190 environmental factors ( $\sigma_{rs}^2$ ). The narrow sense heritability was then estimated as:

$$191 \quad h^2 = \frac{\sigma_g^2}{\sigma_g^2 + \sigma_{cage}^2 + \sigma_{rs}^2}$$

192 Sequencing run was included as a covariate in both non-rarefied and rarefied  
193 datasets. For our non-rarefied dataset, narrow sense heritabilities were calculated using  
194 the number of read counts as an additional covariate. Significance of heritability

195 estimates was assessed by conducting a restricted likelihood ratio test using the  
196 `exactRLRT()` function in the R-package *RLRsim* (SCHEIPL *et al.* 2008), as applied in  
197 Supplementary Note 3 in ZIYATDINOV *et al.* (2018). We calculated standard errors for the  
198 heritability estimates following code posted on the *lme4qtl* GitHub page:  
199 <https://github.com/variani/lme4qtl/blob/master/demo/se.R>. This script uses the  
200 `deltamethod()` function in the R-package *msm* (<https://github.com/chjackson/msm>) to  
201 approximate standard errors using the delta method. Proportion variance estimates for  
202 kinship and cage for all taxa and their taxonomic level for rarefied data are presented in  
203 **Figure S4**. A comparison of heritability estimates and standard error between non-  
204 rarefied and rarefied data can be seen in **Figure S5**.

### 205 **QTL Mapping**

206 For QTL mapping, rank Z-score transformed relative abundances were mapped  
207 using a linear mixed model in R-package *lme4qtl::relmatLmer()* (ZIYATDINOV *et al.* 2018)  
208 (fit using maximum likelihood (ML), REML=F) on autosomes with kinship included as a  
209 random effect to account for genetic relatedness among animals. For the bacterial taxa  
210 from the five taxonomic levels, we generated QTL mappings with the taxa designated  
211 as the phenotype. Sequencing run (fixed effect) and cage (random effect) were included  
212 in both non-rarefied and rarefied datasets. We included read count as an additional  
213 covariate (fixed effect) for our non-rarefied dataset. Significant and suggestive  
214 associations were identified in a two-step procedure. First, we applied likelihood ratio  
215 tests comparing models with and without genotype. *P*-values derived from these tests  
216 were adjusted for multiple testing across SNPs (within a given taxon) using R function  
217 `p.adjust()` with method “BH” (BENJAMINI AND HOCHBERG 1995). In the second step, we

218 conducted permutation tests (1000 permutations) for taxa that had associations with  
219 adjusted  $p$ -value  $< 0.1$  in the maximum likelihood analysis. Due to the computational  
220 cost of performing permutation tests for each taxa/peak combination, we further filtered  
221 the permutation candidates by only querying the peak with the lowest likelihood  $p$ -value  
222 in regions with peak overlaps. This resulted in permutation  $p$ -values for 4 taxa and 4  
223 peaks (**Table 2**). Annotated genes found within QTL regions with permutation  $p$ -value  $<$   
224  $0.1$  can be found in **Table S5**. Although  $p$ -values are corrected within each trait, no  
225 additional adjustment is made for the search across traits.

226 For every bacterial taxon from the five taxonomic levels with a statistically  
227 significant QTL association, we mapped the OTUs belonging to that taxon. We applied  
228 a 50% zero cut-off filter to only retain common OTUs and generated QTL mappings and  
229 assessed significance as described above for the five taxonomic levels.

230 When necessary for comparison, genomic coordinate spans from other  
231 publications were translated from human hg19 assembly to mouse mm10 assembly  
232 using LiftOver (UCSC). Particularly in the case of small spans or single nucleotides,  
233 LiftOver might require expanding the window being mapped. In our case, we iteratively  
234 increased the window by adding a padding of 0, 10, 100, 1000, 10000, and 100000 bps  
235 on each side of the region of interest until a mapping was achieved. All mapped entries  
236 listed include the final span of the genomic coordinates used including padding (**Table**  
237 **S7D**).

## 238 **Gene Set Pathway Analysis**

239 We used Ingenuity Pathway Analysis (IPA®, QIAGEN Redwood City, CA) software  
240 to conduct gene set pathway analysis on the protein-coding non-predicted genes within  
241 our QTL regions. Genes were uploaded as NCBI Gene IDs for ease of mapping across  
242 IPA's source databases. All analyses were constrained to consider only direct  
243 relationships and exclude any annotation predictions. Additionally, we used IPA's  
244 stringent filter to constrain the analysis to Mouse annotation while considering all  
245 Tissues and Cell Lines. IPA by default shows uncorrected  $p$ -values for enrichment  
246 analyses. We customized all charts and tables to indicate Benjamini-Hochberg False  
247 Discovery Rate instead. In total, we submitted 6 gene lists for parallel analyses, all of  
248 which were filtered to exclude predicted genes and non-protein coding genes: (1) all  
249 genes within any significant QTL region at any taxonomic level, (2) Bacillales only, (3)  
250 Bacteroidales only, (4) Mollicutes only (5) Ruminococcaceae only, and (6)  
251 *Staphylococcus* only. Many taxonomic groups result in similar-enough QTLs that their  
252 gene sets are identical, these groups are the result of picking the lowest taxon for any  
253 identical gene sets while covering all the taxa studied (for instance, phylum Tenericutes  
254 is excluded as it matches the results of class Mollicutes).

## 255 **Data Availability**

256 Our study was performed on a subset of Diversity Outbred mice from the Allan  
257 Pack Sleep Study; the genotypes can be downloaded from the Jackson Lab Diversity  
258 Outbred Database (DODB) website (<https://dodb.jax.org>). QIIME demultiplexed fastq  
259 files with microbiome data are available in the NCBI SRA, BioProject ID: PRJNA639769  
260 (<https://www.ncbi.nlm.nih.gov/bioproject/639769>). All Supplemental Materials (**File S1**,

261 **Figures S1-S5, and Tables S1-S9**) have been uploaded to GSA FigShare under  
262 “Supplemental Material for Schlamp et al., 2020”, and a description of each can be  
263 found at the end of the manuscript.

## 264 **RESULTS**

### 265 ***Variation of gut microbiota***

266 High-throughput sequencing of fecal samples from 247 three month old male mice  
267 from the Diversity Outbred Mouse Panel generated 15,149,384 16S rRNA gene  
268 sequences that passed the quality filtering criteria after demultiplexing (see **Materials**  
269 **and Methods**). On average, 61,334 sequences were obtained per sample (ranging  
270 from 17,658 to 135,803 sequences). Sequences were sorted into 57,014 operational  
271 taxonomic units (OTUs) at 97% identity against the Greengenes 8\_13 database using  
272 open-reference OTU picking (**Table S1A**). Next, OTUs were summarized at five levels  
273 of taxonomy (phylum, class, order, family, genus) (**Table S2A**). In order to focus on the  
274 most abundant microbes, only the taxa present in at least 50% of samples (i.e. present  
275 in 124 samples or more) were used for all following analysis, leaving a total of 75 taxa to  
276 test at the five levels of taxonomy (6 phyla, 8 classes, 11 orders, 20 families, and 30  
277 genera). The most predominant taxa at the phylum level were Firmicutes (average  
278 relative abundance = 48.64%) and Bacteroidetes (46.41%), which is consistent with  
279 previous findings in mice (BENSON *et al.* 2010; MCKNITE *et al.* 2012; ORG *et al.* 2015).  
280 The relative abundances of these taxa were highly variable, with Firmicutes ranging  
281 from 11% to 94%, and Bacteroidetes ranging from 1% to 88% (**Figure 2, Figure S1**).

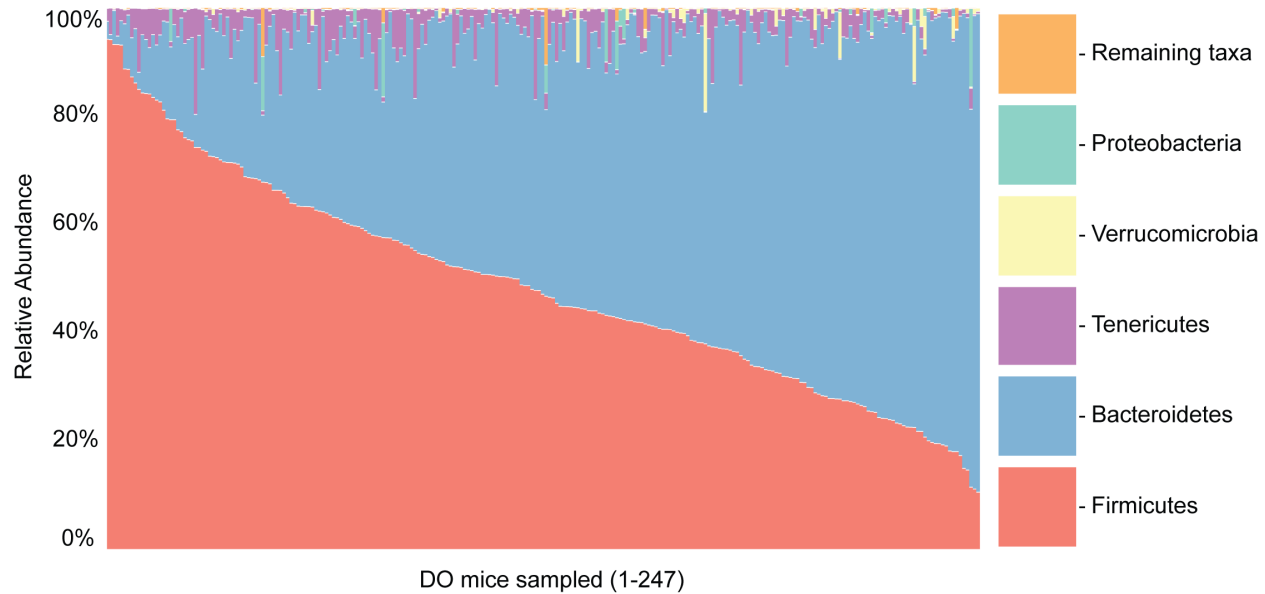

283 **Figure 2. Relative abundances of top ten most abundant phyla across the 247 DO mice.** Relative  
284 abundances shown, mouse samples sorted by phylum Firmicutes, the most abundant phylum.

285 The top 8 most abundant genera were present in at least 99% of the samples. The  
286 two most abundant genera were an unidentified genus within Bacteroidales family S24-  
287 7 (average relative abundance = 43.89%, ranging from 1% to 88%) and another  
288 unidentified genus within Clostridiales (32.35%, ranging from 4% to 78%), consistent  
289 with previous findings in mice (SHIN *et al.* 2016).

290 When dealing with uneven sequence counts across samples, microbiome studies  
291 commonly normalize the data by rarefying sequence counts, which consists of randomly  
292 selecting from each sample an equal number of sequences without replacement (WEISS  
293 *et al.* 2017). It has been argued, however, that rarefaction is not an ideal approach due  
294 to valuable data being discarded (MCMURDIE AND HOLMES 2014). Therefore, we decided  
295 to present our analysis of the non-rarefied data using sequence counts per sample as a  
296 covariate, noting also that the rarefied data consisted of highly similar relative

297 abundances, and provided similar heritability and QTL results (see **File S1** for a detailed  
298 breakdown of these metrics).

### 299 ***Heritability estimation***

300 Each of the 247 individual DO mice used in this study represents a unique  
301 genomic combination of alleles from the original eight progenitor lines. The unit of  
302 inference for phenotypes was the rank Z-score transformed relative abundance of each  
303 taxon at each taxonomic level (phylum, class, order, family, genus) in each individual  
304 mouse, while the units of genetic inference were the SNP genotypes at each of 57,973  
305 sites for each mouse using the MegaMUGA mouse genotyping array (**Figure 1**). Each  
306 SNP genotype is represented by an eight-founder state probability that corresponds to  
307 the probabilities contributed by each founder at each SNP (SVENSON *et al.* 2012) and  
308 those eight-founder probabilities are used to fit the linear models (see **Material and**  
309 **Methods**).

310 We estimated narrow-sense “SNP” heritability ( $h^2$ ) using a linear mixed model in R-  
311 package *lme4qtl* (ZIYATDINOV *et al.* 2018). A linear mixed model was used to predict  
312 whether the effects of the autosomal genotype on the phenotype is proportional to the  
313 genetic similarity between the mice, after adjustment for known factors. Thus,  
314 calculations were based on the kinship matrix (genetic similarity; also called genetic  
315 relatedness matrix (GRM)), expression of a phenotype (taxon relative abundance)  
316 across all samples, and additional covariates (such as sequencing run, read counts,  
317 and cage effect). Significance was assessed by a restricted likelihood ratio test using R-  
318 package *RLRsim* (SCHEIPL *et al.* 2008). More details can be found in **Materials and**  
319 **Methods**. Heritability estimates ranged from 0% to 40%. In total, 23 of the 75 tested



320 taxa were significantly heritable (RLRT  $p$ -value  $< 0.05$ ); we additionally note multiple-  
321 hypothesis normalized Benjamini-Hochberg (BH) False Discovery Rates (**Figure 3**,  
322 **Table S3A**). We hypothesized that higher-level taxa would be found to be more  
323 heritable than lower level taxa, assuming strong functional relatedness between  
324 members of the same taxonomic group, but found that there is no consistent trend  
325 between the taxonomy level and heritability. Our most heritable taxon, the class  
326 Mollicutes (40%, RLTR  $p$ -value of 0.0017, BH  $p$ -value of 0.0884) had a higher  
327 heritability estimate than any clade below it (genus *Anaeroplasma* with 29% and an  
328 unclassified genus in order RF39 with 35%). In contrast, the heritability estimate of class  
329 Bacilli (25%), is surpassed by its subclade, the order Lactobacillales (33%), which is in  
330 turn surpassed by its genus *Lactobacillus*, our second most heritable taxon (36%, RLTR  
331  $p$ -value of 0.0076, BH  $p$ -value of 0.1035). Proportion variance estimates for kinship and  
332 cage for all taxa and their taxonomic level are presented in **Figure 3**.

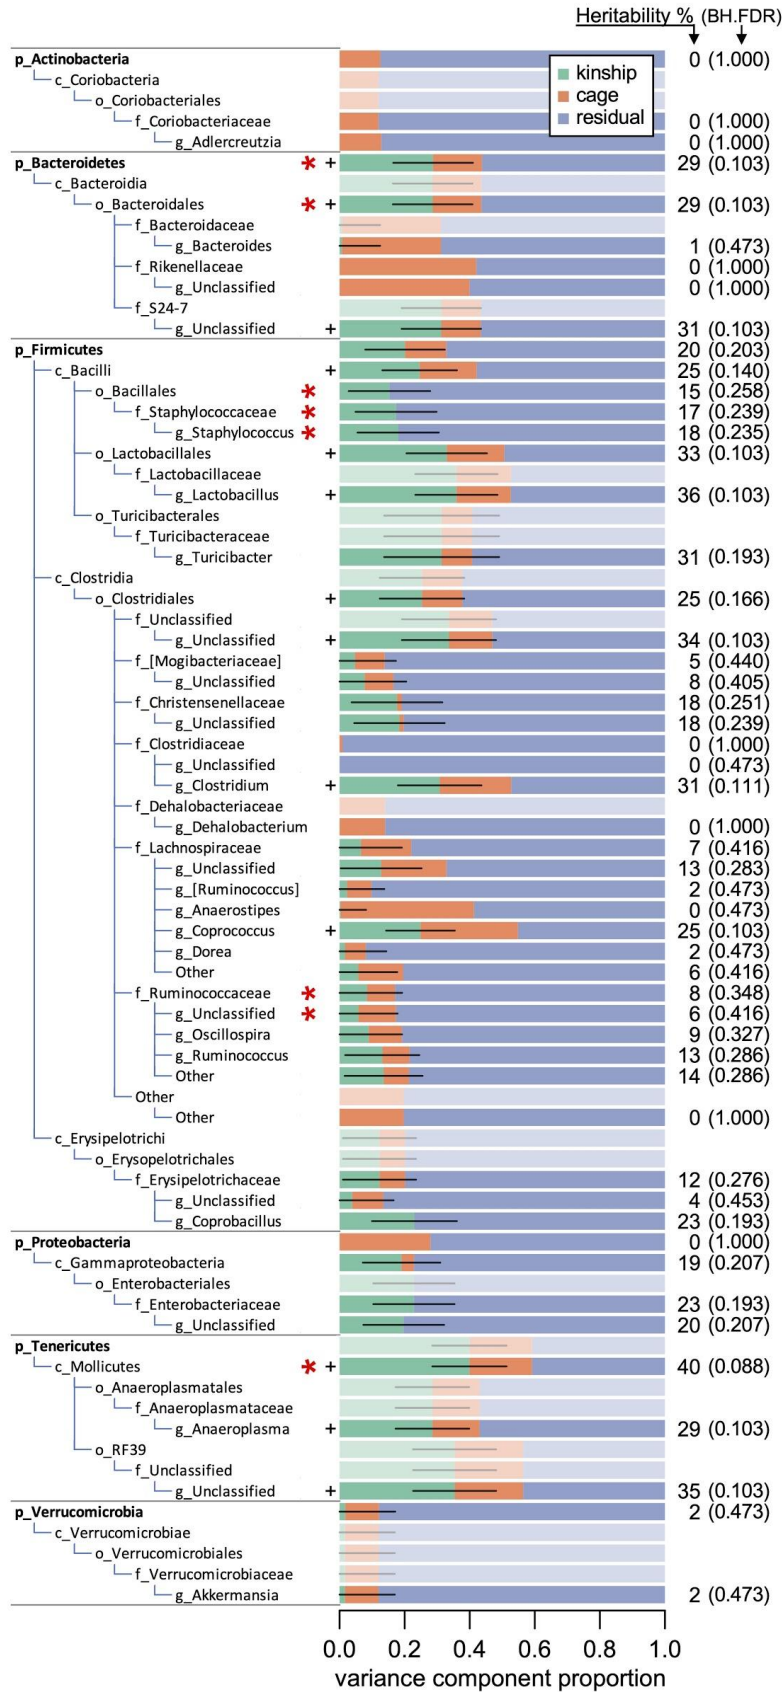

334 **Figure 3. Proportion of variance estimates for kinship and cage for all taxa.** Proportion of variance  
335 estimates for kinship (green), cage effects (orange), and unexplained residual effects (blue) for each  
336 taxon. The kinship proportion of variance is an estimate of narrow sense heritability. Heritability  
337 percentages are shown on the left. Heritability standard errors are shown with black horizontal lines.  
338 Designations p\_, c\_, o\_, f\_, and g\_ are for phylum, class, order, family, and genus, respectively. When  
339 results are identical across taxa in the same phylogenetic branch, only the lowest (most specific) taxa are  
340 shown and the rest are shaded out. Heritability significance is marked with one plus (+, RLTR  $p$ -value <  
341 0.05) and BH FDR is shown in parentheses next to heritability percentages. Taxa marked with a red  
342 asterisk have statistically suggestive QTL (\*, adj.  $p$ -value < 0.1). Complete table of heritability results,  
343 including rarefied data, can be found in **Table S3**.

#### 344 **QTL Mapping**

345 QTL mapping of the bacterial taxa at the five taxonomic levels revealed findings  
346 that suggest statistically significant associations between host genotype and relative  
347 abundances of certain taxa. QTL regions on autosomes were found using the R-  
348 package *lme4qtl* (ZIYATDINOV *et al.* 2018). Significance was assessed first by  
349 comparison of models with and without genotype via a likelihood ratio test, followed by a  
350 genome-wide permutation test. The reported  $p$ -values were corrected for multiple  
351 testing across SNPs (but not across taxa). In total, genetic associations with the  
352 abundance of family Ruminococcaceae, family Staphylococcaceae, and genus  
353 *Staphylococcus* were found to be statistically significant (adj.  $p$ -value < 0.05), and  
354 additional genetic associations with phylum Bacteroidetes, order Bacteroidales, order  
355 Bacillales, and class Mollicutes were statistically suggestive (adj.  $p$ -value < 0.1). QTLs  
356 of order Bacteroidales, genus *Staphylococcus*, and family Ruminococcaceae were also  
357 statistically suggestive at a permutation  $p$ -value < 0.1 (**Table S5**).

358 QTL regions are defined by all contiguous SNPs with LODs above significance  
359 threshold of adjusted  $p$ -value  $< 0.1$ , as illustrated in **Figure 4C**. Multiple QTL for various  
360 taxa overlapped with the QTL regions for their parent taxa, such as a QTL hit for genus  
361 *Staphylococcus* (a genus in the family Staphylococcaceae) overlapping the QTL hit for  
362 family Staphylococcaceae (**Table 1**). The relationship between loci and microbial  
363 abundance is treated as an independent association analysis per taxa. An example of  
364 how these parallel analyses detect similar genomic regions across related taxa is further  
365 illustrated in **Figure 5**.

366 **Table 1. QTL regions for taxa at five taxonomic levels.** Only showing ranked results with adj.  $p$ -value <  
 367 0.1 (statistically suggestive). Results with adj.  $p$ -value < 0.05 (statistically significant) are bolded. When  
 368 results were overlapping across taxa in the same phylogenetic branch (such as phylum Bacteroidetes  
 369 and order Bacteroidales), permutations were calculated only for the lowest (most specific) taxon.  
 370 Complete table of QTL results, including rarefied data, can be found in **Table S4**.

|                  |                                              | chr <sup>a</sup> | maxlod <sup>b</sup> | pos <sup>c</sup> | from <sup>d</sup> | to <sup>e</sup> | $p$ -value      | adj. $p$ -value | perm. $p$ -value |
|------------------|----------------------------------------------|------------------|---------------------|------------------|-------------------|-----------------|-----------------|-----------------|------------------|
| Taxa             | phylum Bacteroidetes                         | 5                | 7.65                | 118.58           | 117.39            | 118.82          | 1.02E-05        | 0.068           | NA               |
|                  | order Bacteroidales                          | 5                | 7.67                | 118.58           | 117.39            | 118.82          | 9.69E-06        | 0.065           | 0.042            |
|                  | order Bacillales                             | 19               | 8.24                | 27.02            | 26.55             | 27.42           | 3.12E-06        | 0.055           | NA               |
|                  |                                              | 19               | 6.95                | 27.82            | 27.82             | 27.97           | 4.02E-05        | 0.085           | NA               |
|                  | family Staphylococcaceae                     | <b>19</b>        | <b>8.09</b>         | <b>27.04</b>     | <b>26.55</b>      | <b>27.46</b>    | <b>4.17E-06</b> | <b>0.032</b>    | NA               |
|                  |                                              | <b>19</b>        | <b>7.84</b>         | <b>27.82</b>     | <b>27.61</b>      | <b>28.18</b>    | <b>6.96E-06</b> | <b>0.032</b>    | NA               |
|                  |                                              | 19               | 6.58                | 32.10            | 31.83             | 32.22           | 8.33E-05        | 0.092           | NA               |
|                  |                                              | 19               | 6.45                | 32.43            | 32.43             | 32.43           | 1.07E-04        | 0.098           | NA               |
|                  | genus <i>Staphylococcus</i>                  | <b>19</b>        | <b>8.26</b>         | <b>27.04</b>     | <b>26.51</b>      | <b>27.46</b>    | <b>3.00E-06</b> | <b>0.025</b>    | <b>0.019</b>     |
|                  |                                              | <b>19</b>        | <b>7.93</b>         | <b>27.82</b>     | <b>27.61</b>      | <b>28.20</b>    | <b>5.78E-06</b> | <b>0.025</b>    | <b>0.033</b>     |
|                  |                                              | 19               | 6.64                | 32.10            | 31.83             | 32.22           | 7.39E-05        | 0.082           | 0.271            |
|                  |                                              | 19               | 6.53                | 32.43            | 32.43             | 32.46           | 9.14E-05        | 0.082           | 0.304            |
|                  | family Ruminococcaceae                       | <b>2</b>         | <b>7.01</b>         | <b>170.57</b>    | <b>170.51</b>     | <b>170.66</b>   | <b>3.63E-05</b> | <b>0.039</b>    | <b>0.137</b>     |
|                  |                                              | 2                | 6.30                | 170.71           | 170.71            | 170.71          | 1.44E-04        | 0.100           | 0.427            |
|                  |                                              | <b>5</b>         | <b>7.18</b>         | <b>31.93</b>     | <b>31.77</b>      | <b>32.19</b>    | <b>2.59E-05</b> | <b>0.035</b>    | <b>0.106</b>     |
|                  |                                              | <b>5</b>         | <b>7.44</b>         | <b>32.52</b>     | <b>32.27</b>      | <b>33.36</b>    | <b>1.55E-05</b> | <b>0.035</b>    | <b>0.066</b>     |
|                  | Unclassified genus in family Ruminococcaceae | 2                | 7.89                | 170.56           | 170.51            | 170.64          | 6.22E-06        | 0.090           | NA               |
| class Mollicutes | 1                                            | 7.00             | 121.32              | 120.23           | 125.20            | 3.66E-05        | 0.089           | 0.142           |                  |

<sup>a</sup> Chromosome in which lies the QTL

<sup>b</sup> Maximum LOD score within the QTL

<sup>c</sup> Position in the chromosome (Mbp) where the maximum LOD score is found

<sup>d</sup> Chromosomal position (Mbp) where the QTL begins

<sup>e</sup> Chromosomal position (Mbp) where the QTL ends

371

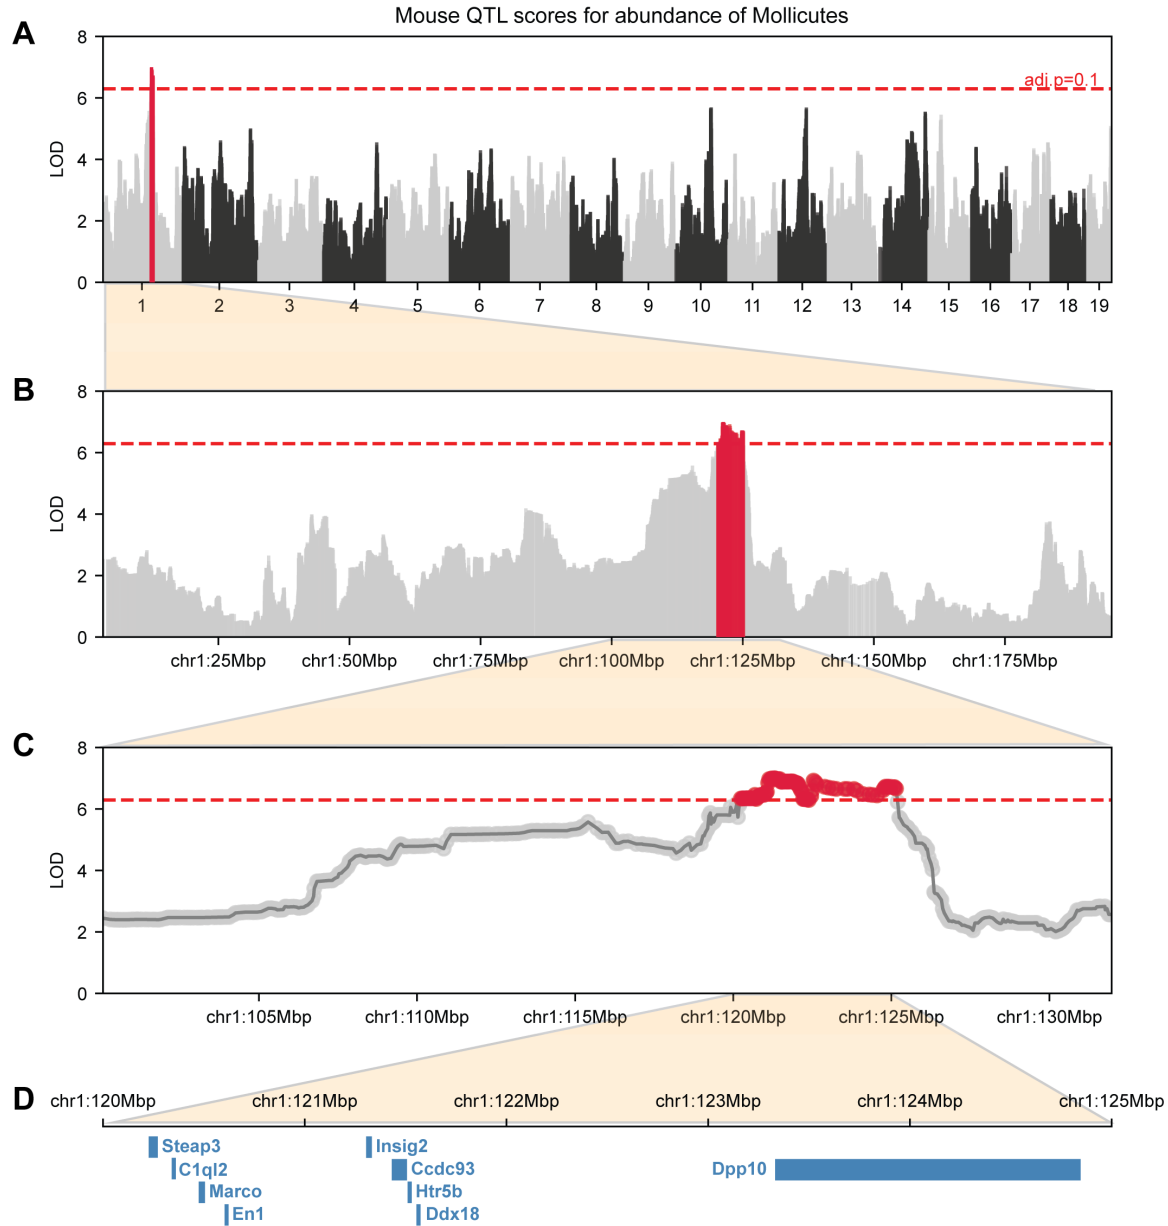

372

373 **Figure 4. QTL scores for abundance of class Mollicutes. (A)** LOD score profile of genome-wide QTL

374 mapping for relative abundance of class Mollicutes shows a significant QTL region (in red) on chr1.

375 Horizontal axis shows genome physical location by chromosome, vertical axis shows LOD score at each

376 site. Horizontal dashed red line marks the significance threshold at adjusted  $p$ -value  $< 0.1$ . (B) Chr1

377 zoomed in shows the significant QTL region in red (chr1:120.24-125.15 Mbp). (C) Further zoom into the

378 area of interest shows in clearer detail how the QTL region is determined by a collection of contiguous

379 significant SNPs (above significance threshold). (D) *Mus musculus* protein-coding genes within the QTL

380 region are colored in blue.

### 381 **OTU level analysis**

382 Next, we decided to increase the specificity of the taxonomic classifications to  
383 operational taxonomic units (OTUs) by compiling all OTUs identified within taxa that had  
384 statistically suggestive QTL (**Table 1**). We filtered out OTUs that were present in less  
385 than 50% of the samples, resulting in 362 OTUs. QTL mapping performed on these  
386 selected OTUs resulted in 28 OTUs with at least one statistically significant association  
387 (adj.  $p$ -value < 0.05), and 33 additional OTUs with at least one statistically suggestive  
388 association (adj.  $p$ -value < 0.1) (**Table S6**).

389 QTL associations to OTUs sometimes overlapped with QTL regions associated to  
390 taxa at higher taxonomic levels, with the most significant ones corresponding to wider  
391 QTL regions (**Table 2**). These results are interesting because if the overlapping QTL  
392 region associated with the broader taxonomic group is narrower and more specific than  
393 the region seen on an individual OTU, this might suggest a cumulative effect of multiple  
394 sub-taxonomies driving a stronger signal at the broader taxonomic level. For example,  
395 QTL for OTU 338796 (chr2:169.64-171.00Mbp) and NCR OTU 170146 (chr5:32.27-  
396 35.85Mbp) within family Ruminococcaceae were both statistically significant (**Table 2**)  
397 and overlapped with QTL regions for Ruminococcaceae (chr2:170.51-170.66Mbp and  
398 chr5:32.27-33.36Mbp, respectively) (**Table 1**), but the QTL regions for the OTUs were  
399 both wider, as shown in **Figure 5**. Note that factors such as the local recombination  
400 intensity profile and SNP density will affect the width of the QTL regions equally across  
401 taxonomies, since the relative abundance of each taxon at each taxonomic level is  
402 considered as a single phenotype queried against the same static, underlying set of  
403 SNPs.

404 **Table 2. QTL regions for OTUs.** Only showing OTUs with adj. *p*-value < 0.1 (statistically suggestive) and  
 405 with a QTL region overlapping QTL from higher-level taxonomies. Results with adj. *p*-value < 0.05  
 406 (statistically significant) are bolded. Permutations were calculated only for peaks with the lowest likelihood  
 407 *p*-value in regions with peak overlaps. OTU numbers are assigned by Greengenes database, 'NR'  
 408 prefixes denote "New Reference" OTUs defined as those with sequences that failed to match the  
 409 reference and are clustered *de novo*. 'NCR' prefixes denote "New Clean-up Reference" OTUs that failed  
 410 to match the new reference OTU collection and are assigned a new random number. Complete table of  
 411 QTL results for OTUs can be found in **Tables S6**.

|      |                                                   | chr <sup>a</sup> | maxlod <sup>b</sup> | pos <sup>c</sup> | from <sup>d</sup> | to <sup>e</sup> | <i>p</i> -value | adj. <i>p</i> -value | perm. <i>p</i> -value |
|------|---------------------------------------------------|------------------|---------------------|------------------|-------------------|-----------------|-----------------|----------------------|-----------------------|
|      | OTU 421792 (order Bacteroidales)                  | 5                | 5.52                | 118.69           | 118.67            | 118.79          | 6.36E-04        | 0.088                | NA                    |
|      | OTU 460953 (order Bacteroidales)                  | 5                | 5.71                | 118.67           | 118.63            | 118.74          | 4.49E-04        | 0.085                | NA                    |
|      | OTU 190835 (order Bacteroidales)                  | 5                | 5.52                | 118.67           | 118.67            | 118.69          | 6.35E-04        | 0.090                | NA                    |
|      | OTU 209408 (order Bacteroidales)                  | 5                | 6.84                | 118.67           | 118.52            | 118.82          | 5.02E-05        | 0.066                | 0.195                 |
| Taxa | OTU NR.OTU100 (family Ruminococcaceae)            | 5                | 8.35                | 31.93            | 30.25             | 32.10           | 2.46E-06        | 0.052                | 0.015                 |
|      | <b>OTU 338796 (family Ruminococcaceae)</b>        | <b>2</b>         | <b>8.28</b>         | <b>170.56</b>    | <b>169.64</b>     | <b>171.00</b>   | <b>2.84E-06</b> | <b>0.032</b>         | <b>0.019</b>          |
|      | OTU NR.OTU95 (family Ruminococcaceae)             | 5                | 7.65                | 31.83            | 31.30             | 32.00           | 1.01E-05        | 0.065                | NA                    |
|      |                                                   | 5                | 7.45                | 32.27            | 32.11             | 32.39           | 1.51E-05        | 0.065                | NA                    |
|      | OTU 336810 (family Ruminococcaceae)               | 2                | 6.47                | 170.54           | 170.27            | 170.59          | 1.03E-04        | 0.093                | NA                    |
|      | <b>OTU NCR.OTU170146 (family Ruminococcaceae)</b> | <b>5</b>         | <b>7.68</b>         | <b>33.33</b>     | <b>32.27</b>      | <b>35.85</b>    | <b>9.58E-06</b> | <b>0.026</b>         | <b>0.056</b>          |

<sup>a</sup>Chromosome in which lies the QTL

<sup>b</sup>Maximum LOD score within the QTL

<sup>c</sup>Position in the chromosome (Mbp) where the maximum LOD score is found

<sup>d</sup>Chromosomal position (Mbp) where the QTL begins

<sup>e</sup>Chromosomal position (Mbp) where the QTL ends

412



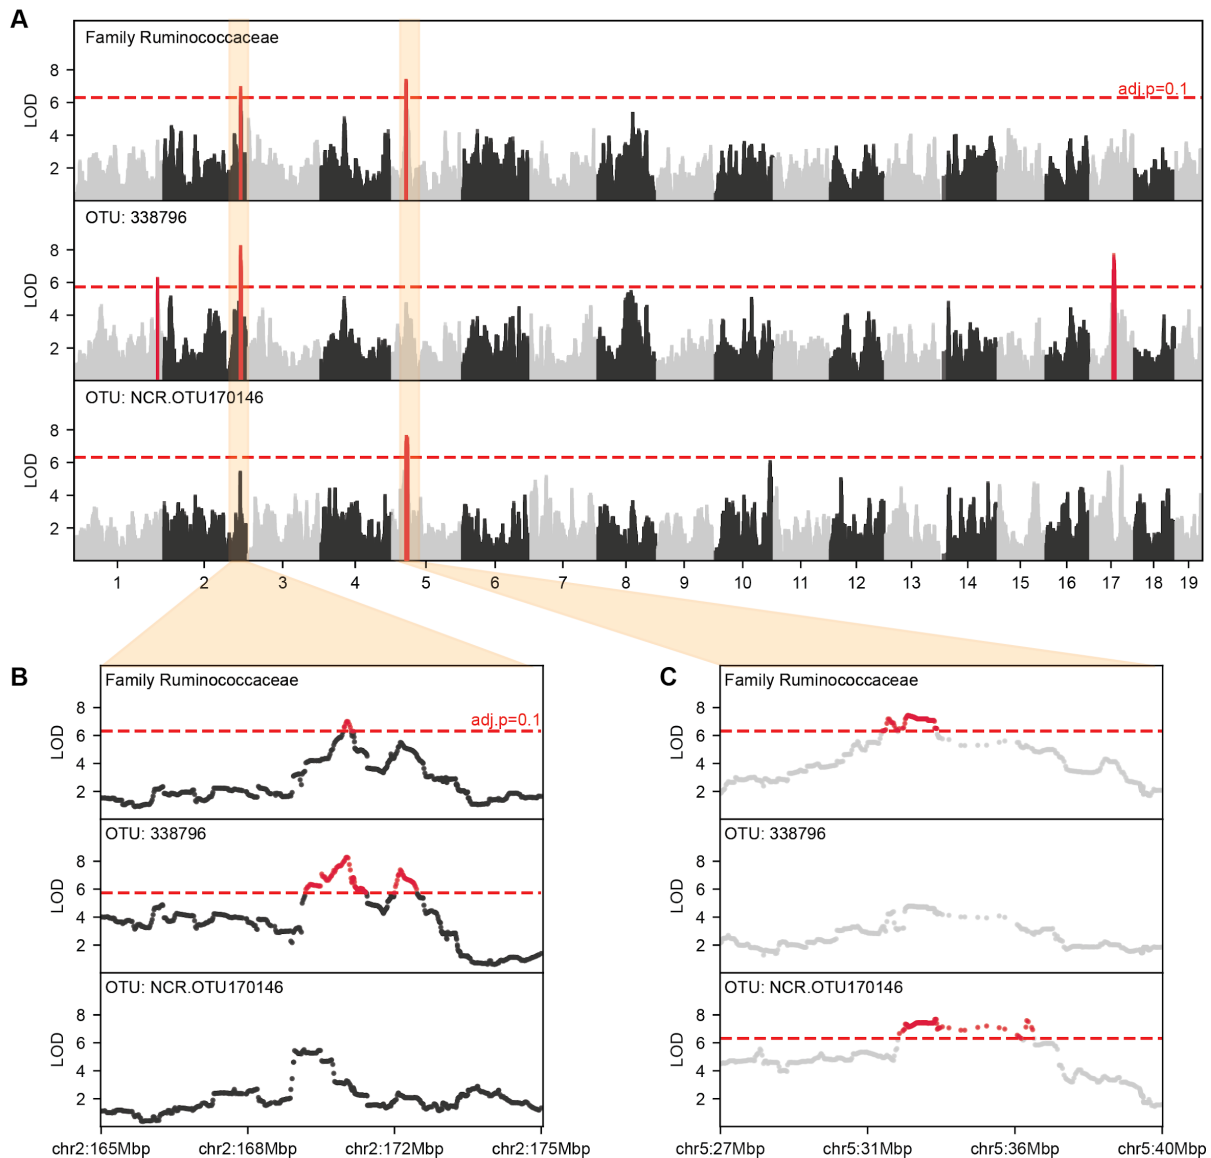

413

414 **Figure 5. Overlap of QTL regions across taxa in the same phylogenetic branch. (A)** LOD score

415 profile of genome-wide QTL mapping for relative abundance family Ruminococcaceae (top panel), and

416 two OTUs found within family Ruminococcaceae: OTU 338796 (middle panel), and NCR OTU 170146

417 (bottom panel). **(B)** Zoom into the area of interest in chr2 shows overlap in QTL regions between family

418 Ruminococcaceae (170.51-170.66Mbp, top panel) and OTU 338796 (169.64-171.00Mbp, middle panel).

419 **(C)** Zoom into the area of interest in chr5 shows overlap in QTL regions between family

420 Ruminococcaceae (32.27-33.36Mbp, top panel) and NCR OTU 170146 (32.27-35.85Mbp, bottom panel).

421 Horizontal axis shows genome physical location by chromosome, vertical axis shows LOD score at each

422 site. Horizontal dashed red line marks the significance threshold at adjusted  $p$ -value < 0.1.

## 423 **Comparison to other studies**

424 Results from other published studies on heritabilities of the various bacterial taxa in  
425 the gut microbiome of mice, pigs, and humans were compiled and compared with our  
426 results (**Figure 6, Table S7**). We find new evidence of heritability of bacterial taxa in  
427 mice only previously seen in human studies. For example, we observed significant  
428 heritability in the phylum Tenericutes as well as several of its subclades, including  
429 genus *Anaeroplasma* and order RF39. These results were consistent across both our  
430 rarefied and non-rarefied datasets, and had not been seen in any other mouse studies,  
431 either because they did not detect these taxa in their studies or their results failed to  
432 identify significant heritability. This novel result is similar to previous host-microbe  
433 associations seen in human studies where significant heritabilities for this taxonomic  
434 lineage were identified in phylum Tenericutes ( $h^2 = 0.34$  (GOODRICH *et al.* 2016) and  
435 0.23 (LIM *et al.* 2017)), class Mollicutes ( $h^2 = 0.32$  (GOODRICH *et al.* 2016) and 0.23 (LIM  
436 *et al.* 2017)), and order RF39 ( $h^2 = 0.31$  (GOODRICH *et al.* 2016)).

437 In some instances, taxa that we did not identify as being significantly heritable —  
438 and in fact have some of our lowest heritability scores — are reported to have high  
439 heritability in other studies. We show some examples of this in **Figure 6**: families  
440 Clostridiaceae and Lachnospiraceae as well as the entire phylum Verrucomicrobia.  
441 Interestingly, both of these families have significantly heritable subclades, whereas the  
442 entire branch of phylum Verrucomicrobia had low heritability estimates. We see a very  
443 low heritability estimate in both our non-rarefied and rarefied datasets for the genus  
444 *Akkermansia* ( $h^2 = 0.02$ ) and every taxonomic level up to phylum Verrucomicrobia, yet  
445 estimates for mice in other studies were as high as  $h^2 = 0.92$  (ORG *et al.* 2015), and  $h^2 =$

446 0.62 (O'CONNOR *et al.* 2014). This discrepancy between heritability estimates for  
 447 *Akkermansia* is not mouse specific, as human microbiome studies see similarly  
 448 conflicting results in their heritability estimates for this same genus: Reporting  
 449 significantly high ( $h^2 = 0.30$  (TURPIN *et al.* 2016)), significantly low ( $h^2 = 0.14$  (GOODRICH  
 450 *et al.* 2016)), and close to zero and not significant estimates ( $h^2 = 0, 0.01$  (DAVENPORT *et*  
 451 *al.* 2015), and 0.06 (LIM *et al.* 2017)).

|                                  | Heritability |             |             |             |             |             |             |             |             |              |             |             |             |             |             |             |      |                 |
|----------------------------------|--------------|-------------|-------------|-------------|-------------|-------------|-------------|-------------|-------------|--------------|-------------|-------------|-------------|-------------|-------------|-------------|------|-----------------|
|                                  | Mouse        |             |             |             |             |             |             |             | Human       |              |             |             |             |             | Pigs        |             |      |                 |
|                                  | Schlamp '20  |             | Org         |             |             |             |             |             | O'Connor    | Goodrich '16 | Davenport   |             |             | Turpin      | Lim         | Hughes      |      | Camarinha-Silva |
|                                  | nonR         | R           | All         | M           | F           | Avg         | One         |             |             | W            | S           | C           |             |             | HB          | RNT         |      |                 |
| <b>p_Bacteroidetes</b>           | <b>0.29</b>  | <b>0.28</b> | 0.53        | <b>0.82</b> | <b>0.73</b> | 0.00        | 0.02        |             | 0.08        |              |             |             | <b>0.33</b> | <b>0.25</b> |             |             |      | <b>0.20</b>     |
| c_Bacteroidia                    | <b>0.29</b>  | <b>0.28</b> | 0.53        | <b>0.82</b> | <b>0.73</b> | 0.00        | 0.02        |             | 0.08        |              |             |             | <b>0.33</b> | <b>0.25</b> |             |             |      | <b>0.20</b>     |
| o_Bacteroidales                  | <b>0.29</b>  | <b>0.28</b> | 0.53        | <b>0.82</b> | <b>0.73</b> | 0.00        | 0.02        |             | 0.08        |              | 0.00        | 0.00        | <b>0.33</b> | <b>0.25</b> |             | 0.00        |      | 0.00            |
| f_S24-7                          | <b>0.31</b>  | <b>0.31</b> | 0.60        | <b>0.86</b> | <b>0.82</b> | 0.00        | 0.00        |             |             |              |             |             | <b>0.33</b> |             |             |             |      |                 |
| <b>p_Firmicutes</b>              | 0.20         | 0.18        | 0.56        | 0.71        | 0.77        | 0.15        | 0.16        |             | 0.00        | 0.00         | 0.00        | 0.00        | 0.18        | 0.10        |             |             | 0.00 |                 |
| c_Bacilli                        | <b>0.25</b>  | <b>0.24</b> | 0.68        | 0.74        | 0.76        | 0.01        | 0.00        |             | 0.03        |              |             |             | 0.19        | <b>0.35</b> |             |             |      |                 |
| o_Lactobacillales                | <b>0.33</b>  | <b>0.35</b> | <b>0.77</b> | <b>0.79</b> | 0.55        | 0.00        | 0.00        |             | 0.00        |              |             |             | 0.10        | <b>0.33</b> | 0.09        | 0.01        |      |                 |
| f_Lactobacillaceae               | <b>0.36</b>  | <b>0.37</b> |             |             |             |             |             |             | 0.04        |              | 0.13        |             | <b>0.26</b> | <b>0.17</b> |             |             |      | 0.00            |
| g_Lactobacillus                  | <b>0.36</b>  | <b>0.37</b> |             |             |             |             |             | 0.74        | 0.04        | <b>0.36</b>  | 0.00        | <b>0.19</b> | <b>0.26</b> | <b>0.15</b> | 0.00        | 0.03        |      | <b>0.34</b>     |
| o_Turicibacterales               | 0.31         |             | 0.54        | 0.75        | 0.82        | 0.12        | 0.12        |             | <b>0.39</b> |              |             |             | <b>0.26</b> |             |             |             |      |                 |
| f_Turicibacteraceae              | 0.31         |             | 0.54        | 0.75        | 0.82        | 0.12        | 0.12        |             | <b>0.39</b> |              |             |             | <b>0.26</b> |             |             |             |      |                 |
| g_Turicibacter                   | 0.31         |             | 0.54        | 0.75        | 0.82        | 0.12        | 0.12        | 0.29        | <b>0.39</b> | 0.00         | 0.19        | 0.13        | <b>0.26</b> |             |             |             |      | 0.00            |
| c_Clostridia                     | <b>0.25</b>  | <b>0.24</b> | 0.58        | 0.80        | 0.77        | 0.00        | 0.03        |             | 0.03        |              |             |             | 0.22        | 0.07        |             |             |      | 0.00            |
| o_Clostridiales                  | <b>0.25</b>  | <b>0.24</b> | 0.58        | 0.80        | 0.77        | 0.00        | 0.03        |             | 0.03        | 0.00         | 0.00        | 0.00        | <b>0.33</b> | 0.07        | 0.03        |             |      | 0.00            |
| f_Christensenellaceae            | 0.18         | <b>0.33</b> |             |             |             |             |             |             | <b>0.42</b> |              |             |             | <b>0.64</b> | <b>0.31</b> |             |             |      |                 |
| f_Clostridiaceae                 | 0.00         | 0.00        | 0.61        | 0.83        | 0.80        | 0.09        | 0.05        |             | <b>0.30</b> | <b>0.35</b>  |             | 0.00        | <b>0.35</b> | <b>0.34</b> |             |             |      |                 |
| g_Clostridium                    | <b>0.31</b>  |             |             |             |             |             |             |             | <b>0.24</b> | 0.10         | <b>0.46</b> | <b>0.04</b> | 0.20        | 0.14        |             |             |      | 0.10            |
| f_Lachnospiraceae                | 0.07         | 0.08        | 0.52        | 0.60        | 0.69        | <b>0.36</b> | 0.07        |             | 0.16        | 0.13         | 0.00        | <b>0.29</b> | <b>0.17</b> | <b>0.15</b> |             | 0.02        |      | 0.09            |
| g_Coprococcus                    | <b>0.25</b>  | <b>0.29</b> | 0.28        | 0.61        | 0.55        | 0.00        | 0.02        | 0.19        | 0.09        | <b>0.46</b>  | 0.06        | <b>0.26</b> | 0.04        | <b>0.16</b> | 0.03        | 0.13        |      |                 |
| <b>p_Tenericutes</b>             | <b>0.40</b>  | <b>0.36</b> |             |             |             |             |             |             | <b>0.34</b> |              |             |             | 0.06        | <b>0.23</b> |             |             |      |                 |
| c_Mollicutes                     | <b>0.40</b>  | <b>0.36</b> |             |             |             |             |             |             | <b>0.32</b> |              |             |             | 0.18        | <b>0.23</b> |             |             |      |                 |
| o_Anaeroplasmatales              | <b>0.29</b>  | <b>0.28</b> |             |             |             |             |             |             |             |              |             |             |             |             |             |             |      |                 |
| f_Anaeroplasmataceae             | <b>0.29</b>  | <b>0.28</b> |             |             |             |             |             |             |             |              |             |             |             |             |             |             |      |                 |
| g_Anaeroplasma                   | <b>0.29</b>  | <b>0.28</b> |             |             |             |             |             | 0.48        |             |              |             |             |             |             |             |             |      |                 |
| o_RF39                           | <b>0.35</b>  | <b>0.32</b> |             |             |             |             |             |             | <b>0.31</b> |              |             |             | 0.18        |             |             |             |      |                 |
| <b>p_Verrucomicrobia</b>         | 0.02         | 0.11        | 0.54        | 0.85        | 0.92        | 0.13        | 0.33        |             | <b>0.15</b> |              |             |             | <b>0.30</b> | 0.05        |             |             |      |                 |
| c_Verrucomicrobiae               | 0.02         | 0.11        | 0.54        | 0.85        | 0.92        | 0.13        | 0.33        |             | <b>0.14</b> |              |             |             | <b>0.30</b> |             |             |             |      |                 |
| o_Verrucomicrobiales             | 0.02         | 0.11        | 0.54        | 0.85        | 0.92        | 0.13        | 0.33        |             | <b>0.14</b> |              |             |             | <b>0.30</b> |             |             |             |      |                 |
| f_Verrucomicrobiaceae            | 0.02         | 0.11        | 0.54        | 0.85        | 0.92        | 0.13        | 0.33        |             | <b>0.14</b> |              |             |             | <b>0.30</b> | 0.06        |             |             |      |                 |
| g_Akkermansia                    | 0.02         | 0.11        | 0.54        | 0.85        | 0.92        | 0.13        | 0.33        | 0.62        | <b>0.14</b> | 0.00         | 0.01        | 0.00        | <b>0.30</b> | 0.06        | 0.14        | 0.00        |      |                 |
| minimum heritability measurement | 0.00         | 0.00        | 0.26        | 0.57        | 0.45        | 0.00        | 0.00        | 0.19        | 0.00        | 0.00         | 0.00        | 0.00        | 0.00        | 0.01        | 0.00        | 0.00        |      | 0.00            |
| maximum heritability measurement | <b>0.40</b>  | <b>0.37</b> | <b>0.77</b> | <b>0.86</b> | <b>0.93</b> | <b>0.36</b> | <b>0.33</b> | <b>0.76</b> | <b>0.42</b> | <b>0.46</b>  | <b>0.46</b> | <b>0.37</b> | <b>0.64</b> | <b>0.46</b> | <b>0.22</b> | <b>0.33</b> |      | <b>0.34</b>     |

452

453 **Figure 6. Comparison of taxon heritabilities across mouse, human, and pig studies.** The green  
 454 shading over heritability estimates ranges from each study's lowest heritability estimate (white) to each  
 455 study's highest heritability estimate (green) to highlight the relative heritability of each taxa per study.  
 456 Statistically significant results are shown in bold font when significance is reported. For our Diversity  
 457 Outbred study, we report both non-rarefied (nonR) and rarefied (R) results. For ORG *et al.* (2015) we

458 report results using all mice (All), just males (M), just females (F), an average per strain (Avg), and a  
459 single mouse per strain (One). ORG *et al.* (2015) and O'CONNOR *et al.* (2014) did not report significances.  
460 For GOODRICH *et al.* (2016) the estimates are calculated by the ACE model, bold values indicate  
461 estimates with a 95% confidence interval not overlapping 0. For DAVENPORT *et al.* (2015) the estimates  
462 are the proportion of variance explained (PVE) estimates ("chip heritability"), we report winter (W),  
463 summer (S), and combined seasons (C) datasets, and bold values indicate estimates with a standard  
464 error not overlapping 0. For TURPIN *et al.* (2016) and LIM *et al.* (2017) estimates are polygenic heritability  
465 ( $H^2_r$ ). For CAMARINHA-SILVA *et al.* (2017) and HUGHES *et al.* (2020) estimates are narrow-sense heritability  
466 ( $h^2$ ). Grey indicates that the taxon was not observed or excluded in a given study. Figure adapted from  
467 GOODRICH *et al.* (2016). Comparisons relevant to the text are shown here, with the full comparison found  
468 in **Table S7**.

469 In addition to comparing our heritability estimates with other studies, we also  
470 contrasted our QTL mapping results of the gut microbiome with those from previous  
471 QTL and GWA studies (**Figure 7, Table S7**).

472 We identified statistically significant QTL associations for the order Bacillales as  
473 well as for the family Staphylococcaceae and the genus *Staphylococcus* within  
474 Bacillales in chr19; another mouse study also found statistically significant QTL  
475 associations for all of the same taxa but on chr17 (MCKNITE *et al.* 2012). A human  
476 microbiome study found statistically significant QTL regions for the class Bacilli, which  
477 comprise the above mentioned order and families (BLEKHMANN *et al.* 2015).

478 Family Ruminococcaceae has been previously found to have significant QTL  
479 associations both in mice (chr12 (BENSON *et al.* 2010) and 3 (BELHEOUANE *et al.* 2017))  
480 and humans (BLEKHMANN *et al.* 2015, HUGHES *et al.* 2020). In our study,  
481 Ruminococcaceae was identified as associated with chromosomes 2 and 5. We also

482 identified a QTL hit for the phylum Bacteroidetes in chr5 while another mouse study  
483 identified a significant hit in chr14 (WANG *et al.* 2015). Within Bacteroidetes, even  
484 though we did not find any significant QTL results for the genus *Bacteroides*, many  
485 other mouse studies have (chr1 (WANG *et al.* 2015, BELHEOUANE *et al.* 2017), 4  
486 (MCKNITE *et al.* 2012), 9 (LEAMY *et al.* 2014), 11 (BUBIER *et al.* 2018), 16 (LEAMY *et al.*  
487 2014), and 18 (LEAMY *et al.* 2014)) as well as a human study (BLEKHMANN *et al.* 2015).

488 Phylum Tenericutes had a significant hit in chr1 in both our non-rarefied and  
489 rarefied datasets, and family Lachnospiraceae had a statistically suggestive QTL in  
490 chr10 in our rarefied dataset but not in our non-rarefied dataset. Both of these taxa had  
491 significant QTL hits in a human study (BLEKHMANN *et al.* 2015).

492 Finally, we did not observe any QTL overlaps with KEMIS *et al.* (2019) (**Table S7**),  
493 which also used the Diversity Outbred mice population in their microbiome association  
494 study. This lack of overlap is likely due to the highly different diet used in their  
495 experiments (high-fat, high-sucrose), and further highlights the strong impact of diet  
496 alone in microbiome composition.

|                         | QTL/GWAS signals    |                  |        |         |         |               |        |            |                         |               |               |
|-------------------------|---------------------|------------------|--------|---------|---------|---------------|--------|------------|-------------------------|---------------|---------------|
|                         | Mouse               |                  |        |         |         |               |        |            | Human                   |               |               |
|                         | Schlamp '20<br>nonR | Schlamp '20<br>R | Benson | McKnite | Leamy   | Wang '15<br>H | Bubier | Belheouane | Kemis                   | Blekhman      | Hughes<br>RNT |
| <b>p_Bacteroidetes</b>  | 5                   | 5                |        |         |         | 14            |        |            |                         |               |               |
| └ c_Bacteroidia         |                     |                  |        |         |         |               |        |            |                         |               |               |
| └└ o_Bacteroidales      | 5                   | 5                |        |         |         |               |        |            |                         |               |               |
| └└└ f_Bacteroidaceae    |                     |                  |        |         |         |               |        |            |                         |               |               |
| └└└└ g_Bacteroides      |                     |                  |        | 4       | 9,16,18 | 1             | 11     | 1          |                         | 9 (4)         |               |
| <b>p_Firmicutes</b>     |                     |                  |        |         |         |               |        |            |                         | 1 (3)         |               |
| └ c_Bacilli             |                     |                  |        |         |         |               |        |            | 2 (12), 10 (7), 14 (12) |               |               |
| └└ o_Bacillales         | 19                  |                  |        | 17      |         |               |        |            |                         |               |               |
| └└└ f_Staphylococcaceae | 19                  |                  |        | 17      |         |               |        |            |                         |               |               |
| └└└└ g_Staphylococcus   | 19                  |                  |        | 17      |         |               |        |            |                         |               |               |
| └ c_Clostridia          |                     |                  |        |         |         |               |        |            |                         |               |               |
| └└ o_Clostridiales      |                     |                  |        |         |         |               |        |            |                         | 1 (3), 11 (9) |               |
| └└└ f_Lachnospiraceae   |                     | 10               |        |         |         |               |        |            |                         | 1 (1)         |               |
| └└└└ f_Ruminococcaceae  | 2,5                 | 2,5              | 12     |         |         |               |        | 3          |                         | 10 (10)       |               |
| <b>p_Tenericutes</b>    |                     |                  |        |         |         |               |        |            |                         | 6 (17)        |               |
| └ c_Mollicutes          | 1                   | 1                |        |         |         |               |        |            |                         |               |               |

497

498 **Figure 7. Comparison of taxa with QTL associations across mouse and human studies.**

499 Associations with each taxon are marked in dark blue if statistically suggestive and bolded in white if  
500 statistically significant, or light blue if not significant. Gray indicates that the taxon was not observed or  
501 excluded in a given study. The chromosome numbers where the QTL were found are denoted in each  
502 box. For our Diversity Outbred study, we report both non-rarefied (nonR) and rarefied (R) results. In the  
503 human studies, the corresponding syntenic mouse chromosome was added in parenthesis. Figure  
504 adapted from GOODRICH *et al.* (2016). Selected comparisons shown, full comparison found in **Table S7**.

505 **Gene level analysis**

506 Examining the QTL mapping results from previous studies, it was apparent that  
507 although different studies might all have found significant QTL regions for a particular  
508 bacterial taxon, they identified different genomic positions as showing associations. In  
509 order to identify common functions and diseases associated with the genes within our  
510 QTL regions, we used Ingenuity Pathway Analysis (IPA®, QIAGEN Redwood City, CA)  
511 to run a cumulative gene set enrichment analysis on all 1423 genes associated with  
512 non-rarefied microbiome abundance spanning 7 significant QTL and 11 suggestive QTL  
513 across the five taxonomic levels (phylum, class, order, family, genus) (**Table S4**) and 54

514 significant QTL and 232 suggestive QTL at the OTU level (**Table S6**). All genes found  
515 within each QTL region were included. When QTL regions overlapped across taxa of  
516 the same phylogenetic branch (as illustrated in **Figure 5**), overlapping genes were only  
517 counted once. Additionally, we ran taxon-specific enrichment analysis to profile the  
518 specific functions and diseases associated with genes in the QTL regions associated  
519 with relative abundance of phylum Firmicutes (n = 23 genes), class Mollicutes (n = 9),  
520 order Bacteroidales (n = 10), family Ruminococcaceae (n = 15), and genus  
521 *Staphylococcus* (n = 8), excluding OTU-specific QTL regions.

522 Through the cumulative gene set analysis, we found 25 networks each containing  
523 subsets of our genes. We can try to characterize the biological significance of these  
524 networks by measuring the enrichment of disease and functional annotations in the  
525 genes of each network (**Table S8**). We find remarkable functional signatures in the  
526 highest-ranked of these 25 networks, with enrichment in the broad categories of  
527 Immunological Disease and Inflammatory Response (Network 1, **Figure 8A**), Lipid  
528 Metabolism and Molecular Transport (Network 2, **Figure 8B**), and Connective Tissue  
529 Development and Function (Network 3, **Figure 8C**). These associations are highly  
530 concordant with increasingly well-understood roles in host-microbiome interaction  
531 studies. In Network 1, we find the most enriched specific functions relate to microbiome  
532 associated phenotypes, namely hypersensitive reactions (BH-FDR =  $7.56e-4$ ), allergies  
533 (BH-FDR =  $1.39e-3$ ), and atopic dermatitis (BH-FDR =  $6.35e-3$ ). Additionally, we find  
534 that despite lack of overlap between the gene membership of these four highest-ranked  
535 networks, they all have a significant enrichment for functions in both Gastrointestinal  
536 Disease (BH-FDRs between  $1.26e-3$  and  $2.47e-3$ ) and Digestive System Development

537 and Function (BH-FDRs between  $3.41e-3$  and  $3.34e-2$ ). Interestingly, we also find  
538 consistent significant enrichment of cancer annotations across all four networks with  
539 varying overlap of tissues: prostate and renal cancers (Network 1), metastasis and  
540 colorectal cancer (Network 2), and breast, ovarian, and gastrointestinal cancer (Network  
541 3). Only liver cancer appeared to be enriched in all three networks. A full exhaustive list  
542 of significantly enriched categories, diseases, and functions can be found in **Table S9**.



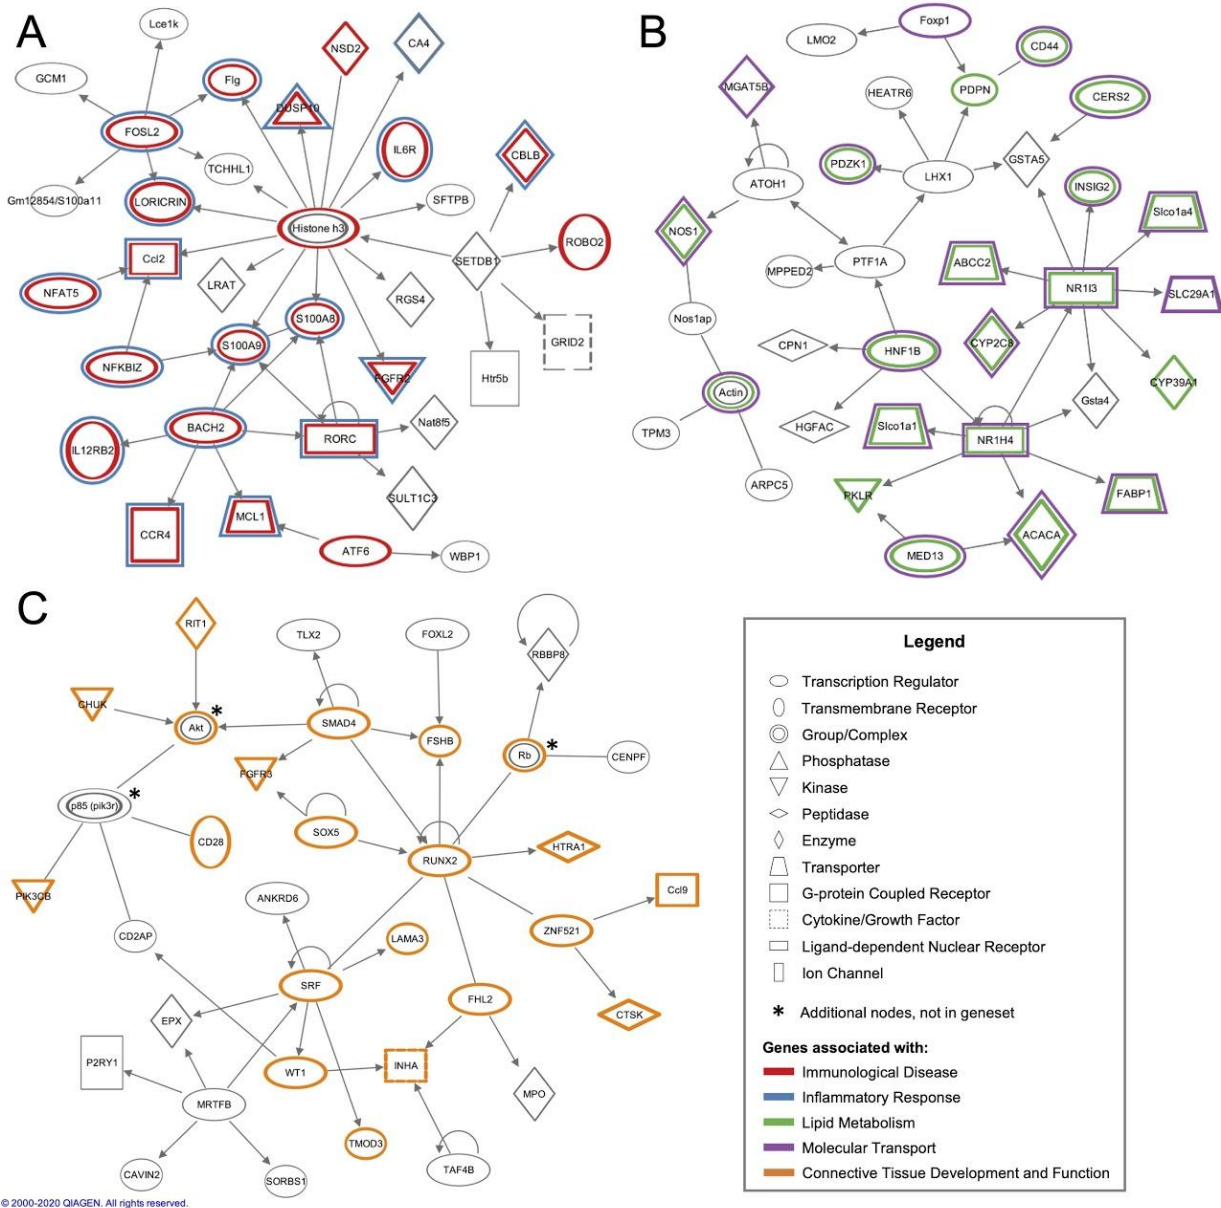

543

544 **Figure 8. Ingenuity Pathway Analysis (IPA) three highest-ranked interaction networks generated**

545 **from cumulative gene set analysis.** Genes circled in color are all associated with disease and

546 functional annotations as specified below. Nodes marked with an asterisk belong to closely associated

547 genes added by IPA that were not in the input dataset. **(A)** Network 1 shows genes associated with

548 Immunological Disease (circled in red) and Inflammatory Response (blue). **(B)** Network 2 shows genes

549 associated with Lipid Metabolism (green) and Molecular Transport (purple). **(C)** Network 3 shows genes

550 associated with Connective Tissue Development and Function (orange).

551 Through taxon-specific enrichment analysis we find a consistent enrichment in  
552 development of adenocarcinoma (FDRs between 0.00% and 2.87%) in what are  
553 otherwise heterogeneous functional profiles (**Figure S2A-E**). We observe an  
554 enrichment of lipid metabolism pathway annotation through genes *ASAH2*, *VLDLR*, and  
555 *SGMS1* in the phylum Firmicutes (FDRs 0.31% to 2.73%) all of which are again  
556 detected in its subclade, the genus *Staphylococcus* (FDRs 0.22% to 2.98%) (**Figure**  
557 **S2A,B**). We also observe an enrichment in breast and ovarian cancer annotations in  
558 phylum Firmicutes (FDRs 0.31% to 2.73%), which is shared with its larger subclade, the  
559 family Ruminococcaceae (FDRs 0.34% to 2.95%) (**Figure S2A,C**).

560 Finally, in both the cumulative and taxon-specific gene sets we find genes  
561 canonically tied to the commensal microbiome and pathogen-host interactions. The  
562 gene *MARCO*, which lies within a QTL for the abundance of class Mollicutes, encodes a  
563 pattern recognition receptor which is part of the innate antimicrobial immune system,  
564 binding both Gram-positive and Gram-negative bacteria. We consistently find genes  
565 associated with bacterial response in these gene sets, including *TLR2*, a membrane  
566 protein that recognizes bacterial, fungal and viral molecules and has been shown to  
567 have benign associations when binding a protein produced by the gut microbiome  
568 (OTTMAN *et al.* 2017). These gene sets also include both *FCGR1A* and *FCER1G*,  
569 fragments of the high affinity IgE Receptor, *Spondin2*, a cell adhesion protein that binds  
570 directly to bacteria and their components as an opsonin for the macrophage  
571 phagocytosis of bacteria, *BPIFA1*, an antimicrobial protein that inhibits the formation of  
572 biofilm by Gram negative bacteria, and both *PGLYRP3* and *PGLYRP4*, both

573 peptidoglycan recognition proteins that bind to murein peptidoglycan of Gram-positive  
574 bacteria.

## 575 **DISCUSSION**

576       There exists a complex and multifaceted relationship between the gut microbiome  
577 and its host's genome, where recent studies are beginning to show the true magnitude  
578 of these connections. Our results seek to further understand this relationship by  
579 measuring the heritability of bacterial relative abundance phenotypes and by  
580 categorizing the functional and disease pathways that may be associated with specific  
581 bacterial abundances in the mouse gut microbiome.

582       We detect the first instance of statistically significant heritability in the phylum  
583 Tenericutes in a mouse model. Specifically, we see that its subclade, class Mollicutes,  
584 is our most heritable taxon (40% BH  $p$ -value of 0.088). Dramatic increases in Mollicute  
585 abundance have been observed in mice when subjected to a high-fat, high-sugar diet in  
586 comparison to a plant polysaccharide-rich diet. This Mollicute bloom seems to come at  
587 the expense of Bacteroidetes abundance and an overall lower diversity in murine  
588 microbiomes (TURNBAUGH *et al.* 2017). Understanding the heritable aspects of Mollicute  
589 abundance could help elucidate the host-genetic determinants of body weight control  
590 and the etiology of obesity, which has been thus far extremely challenging with host-  
591 genome GWAS alone (MÜLLER *et al.* 2018, SPEAKMAN *et al.* 2018).

592       Our second most heritable taxon is genus *Lactobacillus* (36% BH  $p$ -value of  
593 0.103), which shares a similarly strong but benign association to body weight control in  
594 the literature. The genus *Lactobacillus* contains several species with strains commonly

595 used as probiotics. In contrast to the Mollicute lineage, *Lactobacilli* have been used in  
596 mouse models of hyperlipidemia to show an increase of abundance of Bacteroidetes  
597 and Verrucomicrobia, and improving their lipid metabolism (CHEN *et al.* 2014). The  
598 function of these clades as a whole is, however, not clear-cut: *Lactobacillus* is a large  
599 genus containing species and strains with differing roles and probiotic effects in humans  
600 (McFARLAND *et al.* 2018) and members of the class Mollicutes may have strain-specific  
601 positive effects on gastrointestinal disease in mice, rather than a negative phenotype as  
602 a whole (ZHAI *et al.* 2019).

603         These examples present a microbiome-host interaction landscape in which  
604 associations between host health and microbiome abundance can be extremely taxon-  
605 specific, displaying functional heterogeneity at the species level. Building a baseline  
606 understanding of the resolution at which genetic associations change for different  
607 lineages is vital to build an understanding of health, function, and coevolution in  
608 microbe-host models.

609         We perform parallel analyses to find specific associations between genetic loci and  
610 individual taxonomic groups, treating sub-clades as independent phenotypes from their  
611 parent taxa during QTL calculations. This setup allows us to contextualize significant  
612 QTL across the bacterial taxonomy, and we find similarities in both the genomic regions  
613 detected and the functional annotation of covered genes for taxa in the same clade. We  
614 also greatly benefit from the type of QTL analysis facilitated by the DO mouse model,  
615 where the genotype for specific loci can be calculated and contrasted consistently  
616 across all samples, eliminating the need for the windowed confidence intervals which  
617 are common in this type of analysis.

618 We find functional associations in the gene sets identified by the QTL results that  
619 span disease and development phenotypes beyond obesity. We find QTL regions  
620 spanning genes with annotations for various phenotypes that are already widely studied  
621 in the context of host-microbiome interactions. Among them we see cancer-associated  
622 annotations, both in the more obvious gastrointestinal categories like colorectal cancer  
623 (CHEN *et al.* 2012; AHN *et al.* 2013, ZACKULAR *et al.* 2014; ERICSSON *et al.* 2015) and the  
624 surprising, but well-studied, breast (YANG *et al.* 2017; FERNÁNDEZ *et al.* 2018; ZHU *et al.*  
625 2018), ovarian (XU *et al.* 2020), and liver cancers (YU AND SCHWABE 2017). We also see  
626 an expected plethora of immune and inflammatory pathways, including some  
627 microbiome-associated disease hallmarks, including colitis (KNOX *et al.* 2019), allergic  
628 response (Pascal *et al.* 2018), and atopic dermatitis (KIM AND KIM 2019). Beyond  
629 pathology, we see an enrichment of lipid metabolism pathways, coherent with the gut  
630 microbiome's direct and indirect role in host lipid modulation (GHAZALPOUR *et al.* 2016;  
631 HEAVER *et al.* 2018; BROWN *et al.* 2019; JOHNSON *et al.* 2019).

632 The relationship between a host's health and their microbiome seems increasingly  
633 complex. Links to host development, disease, and metabolism are still being found  
634 across body sites and a wealth of bioinformatic and modelling strategies continue to  
635 emerge (MALLA *et al.* 2019). These results are a promising and heavily funded target for  
636 precision medicine (PROCTOR *et al.* 2019), identifying potential biomarkers for  
637 predisposition to type 1 diabetes (UUSITALO *et al.* 2016) and asthma (DURACK *et al.*  
638 2018) in children, and colorectal cancer in adults (SHAH *et al.* 2018). As we move  
639 forward to understand the mechanisms underlying host-health modulation by the  
640 microbiome, it is imperative that we understand which parts of host genomes might

641 have underlying associations with microbial species, both to understand the limitations  
642 of animal models as a relevant human proxy, and to determine whether host genetics  
643 plays a causal role.

644       Currently, there is a scarcity of studies discussing heritabilities and QTL mappings  
645 of bacteria within the gut microbiome. Despite the potential and funding of this field,  
646 there is still an absence of a standardized methodology for performing these studies  
647 that leads to the use of different procedures and analytical methods, making it  
648 increasingly difficult to compare results across studies (GOODRICH *et al.* 2017;  
649 KURILSHIKOV *et al.* 2020). We see this in our comparisons of results with previous  
650 studies, as we do not observe consistent overlap in the estimated heritabilities and QTL  
651 associations in any one taxa. Depending on the study, we see differences in which  
652 covariates are able to be included, which databases or mapping algorithms are used to  
653 determine OTUs, and the manner in which results are reported. One salient example is  
654 our use of both the kinship matrix and co-housing as a random effect in our analysis,  
655 which required a tailored approach that extended the standard DO mice pipeline, which  
656 usually only allows a kinship matrix as random effect. Ultimately, the current state of the  
657 field for profiling different characteristics of the gut microbiome is still rapidly evolving  
658 and as it matures and more studies are undertaken, it will become easier to compare,  
659 validate, and aggregate results.

660       Although our results support the claim that host genetics can impact the gut  
661 microbiome composition in ways that are relevant to the health of the host, our study  
662 has some limitations. There is significant room for improvement in the statistical power  
663 of this study design through an increase in sample size (currently  $n = 247$  DO mice).



664 Conducting QTL mapping with small sample sizes may lead to the ‘Beavis effect’ which  
665 is a failure to detect QTL of small effect sizes as well as an overestimation of effect size  
666 of the QTL that are discovered (MILES AND WAYNE 2008). Our study is also subject to the  
667 trade-offs inherent in the Diversity Outbred design: since the genome of each mouse is  
668 a unique mixture of the 8 strains from the CC population, the genotype of each DO  
669 mouse is independent from other DO mice, and is irreproducible. This hampers the  
670 ability to generate biological replicates relative to inbred models, which in turn makes  
671 replicating results from the DO population limited to replication of marginal genetic  
672 effects. However, this limitation can be partially circumvented by using the CC lines as a  
673 form of validation, since they can provide reproducible genotypes (SVENSON *et al.* 2012).  
674 Finally, associations between host genetics, microbiome abundance, and functional  
675 pathways must be investigated experimentally to confirm mechanism and causality.  
676 This is particularly difficult in the overlap of microbiome and genetic association, as  
677 hypothesis generation is a challenging and often gene-specific approach which must  
678 account for variation in both host and microbial communities.

679 Our results provide insight into the complex interplay between host genetics and  
680 the gut microbiome, and isolate associations between microbial taxa and QTL. Overall,  
681 this is a challenging analytical setup as we are trying to associate locus-specific  
682 variation with several inter-dependent phenotypes in a system with several covariates.  
683 Microbiome analyses are very sensitive to the traits, population, and environment under  
684 study, which we mitigate by taking into account co-housing and relatedness while also  
685 performing computationally intensive permutation tests to provide empirical  $p$ -values on  
686 our most significant QTL hits. As it stands, this method could be further utilized in a

687 study with a novel microbial colonization (or other microbiome perturbation), where  
688 measuring the same phenotypes, in a similar setup, could be used to estimate the  
689 heritability and identify QTL for the successful introduction of a new taxon (or response  
690 to some other perturbation).

691 While most of the variation in the gut microbiome composition is not due to  
692 genetics but rather environmental factors (ROTHSCHILD *et al.* 2018), attributes of the gut  
693 microbiome that are clearly heritable may provide important insights about host-  
694 microbiome interactions and the mechanisms that impact microbiome composition. As  
695 the microbiome field moves toward novel disease models, biomarkers, and treatments,  
696 it is imperative that we understand the host-genetic variation that might influence the  
697 appropriateness of our models, the accuracy of our biomarkers, and the efficacy of new  
698 treatments.



## 699 ACKNOWLEDGMENTS

700 The authors want to thank Noah Clark, Jessica L. Sutter, Qiaojuan Shi, Emily  
701 Davenport, and Afrah Shafquat for all the help and advice provided. F.S. was supported  
702 by a Presidential Life Science Fellowship (PLSF) from Cornell University. This work was  
703 supported by NIH grant R01 GM 070683.

## 704 AUTHOR CONTRIBUTIONS

705 F.S., A.G.C, G.A.C, and R.E.L. conceived the study. A.P. provided the samples.  
706 F.S. extracted and generated the 16S rRNA gene sequencing data. F.S., E.J.C., P.S.,  
707 J.K.G., R.E.L., G.A.C, and A.G.C. conceived the computational and statistical analyses.  
708 F.S., D.Y.Z., E.J.C., J.F.B., M.E., and P.S. performed the computational and statistical  
709 analyses. F.S., J.F.B., D.Y.Z., E.J.C, and A.G.C. wrote the manuscript.

## 710 SUPPLEMENTAL MATERIAL

711 **File S1 - Analysis on rarefied data.** Detailed breakdown of variation of gut microbiota, heritability  
712 estimates, and QTL association results for rarefied data.

713 **Figure S1 - Taxa relative abundance frequencies.** Stacked bar plots and box plots depicting  
714 relative abundance frequencies of the top ten most abundant taxa for each of five taxonomic levels.  
715 Relative abundance frequencies are plotted for taxa levels from both the non-rarefied and the rarefied  
716 datasets.

717 **Figure S2 - Heatmaps showing the genes involved in any function that were found**  
718 **enriched by IPA gene set analysis.** Taxon-specific analysis on genes in the QTL regions  
719 associated with relative abundance of phylum Firmicutes **(A)**, genus *Staphylococcus* **(B)**, family  
720 Ruminococcaceae **(C)**, class Mollicutes **(D)**, and order Bacteroidales **(E)**. We only show annotations  
721 with a False Discovery rate under 3% after multiple-hypothesis correction. Filled-in cells indicate that

722 the gene listed at the top of that column is annotated with the function or disease of that row. Only  
723 genes in the gene set of interest are shown, these charts do not display all gene members of each  
724 pathway.

725 **Figure S3 - Correlation plot between non-rarefied and rarefied taxa.** Heatmap

726 depicting the Pearson correlations between the relative common taxa relative abundances in non-  
727 rarefied (NonR) and rarefied (R) data, revealing that the same taxa from both non-rarefied and  
728 rarefied datasets always group closer together than with other taxa, followed by taxa belonging to the  
729 same clade.

730 **Figure S4 - Proportion of variance estimates for kinship and cage for all taxa in**

731 **rarefied data.** Proportion of variance estimates for kinship (green), cage effects (orange), and  
732 unexplained residual effects (blue) for each taxon. The kinship proportion of variance is an estimate  
733 of narrow sense heritability. Heritability percentages are shown on the left. Heritability standard error  
734 values are shown with black horizontal lines. Designations p\_, c\_, o\_, f\_, and g\_ are for phylum,  
735 class, order, family, and genus, respectively. When results are identical across taxa in the same  
736 phylogenetic branch, only the lowest (most specific) taxa are shown and the rest are shaded out.  
737 Heritability significance is marked with one plus (+, RLTR  $p$ -value < 0.05) and BH FDR is shown in  
738 parentheses next to heritability percentages. Taxa marked with a red asterisk have statistically  
739 suggestive QTL (\*, adj.  $p$ -value < 0.1). Complete table of heritability results, including non-rarefied  
740 data, can be found in **Table S3**.

741 **Figure S5 - Comparison of heritability estimates between non-rarefied and**

742 **rarefied taxa.** Circles with purple fill correspond to non-rarefied taxa with statistically significant  
743 heritabilities. Circles with green outlines correspond to rarefied taxa with statistically significant  
744 heritabilities. Standard errors are shown as horizontal blue lines for non-rarefied taxa and vertical  
745 orange lines for rarefied taxa.

746 **Table S1 - Relative abundance of OTUs.** Relative microbial abundance at the OTU level for

747 each DO mouse in non-rarefied data (**A**) and rarefied data (**B**).

748 **Table S2 - Microbial relative abundance summarized at five levels of taxonomy.**

749 Relative microbial abundance summarized at five levels of taxonomy (phylum, class, order, family,  
750 and genus) for each DO mouse in non-rarefied data (**A**) and rarefied data (**B**).

751 **Table S3 - Heritability results at five taxonomic levels.** Complete heritability

752 measurements ( $h^2$ ) as well as their respective  $p$ -values, adjusted  $p$ -values, and standard errors for all  
753 tested taxonomies at the five taxonomic levels from the non-rarefied (**A**) and rarefied (**B**) datasets.

754 **Table S4 - QTL results at five taxonomic levels.** QTL regions and their respective  $p$ -values,

755 permutation  $p$ -values (when applicable), and genes found within the QTL interval at the five  
756 taxonomic levels from the non-rarefied (**A**) and rarefied (**B**) datasets.

757 **Table S5 - Genes within QTL regions with suggestive permutation  $p$ -value.** Detailed

758 annotations for all genes found within QTL regions with a permutation  $p$ -value  $<0.1$  at the five  
759 taxonomic levels.

760 **Table S6 - QTL results at OTU level in non-rarefied dataset.** QTL regions and their

761 respective  $p$ -values, permutation  $p$ -values (when applicable), and genes found within the QTL interval  
762 at the OTU level from the non-rarefied dataset.

763 **Table S7 - Comparison of heritabilities and QTL with other studies.** Comparison of

764 taxa heritabilities and QTL from our analyses with other studies across mouse, human, and pig  
765 studies (**A**). Information on source studies for heritability values in (**B**) and for QTL/GWAS in (**C**). Full  
766 human to mouse synteny mapping results for human studies in (**D**).

767 **Table S8 - Gene network relationships from Figure 8.** Annotated relationships between the

768 genes in network 1 (**A**), network 2 (**B**), and network 3 (**C**) from **Figure 8**.

769 **Table S9 - Functional annotation table from IPA analysis.** Detailed functional annotations

770 from cumulative gene set enrichment analysis using IPA on 1423 genes associated with non-rarefied  
771 microbiome abundance.

772 **LITERATURE CITED**

773 Ahn, J., R. Sinha, Z. Pei, C. Dominianni, J. Wu *et al.*, 2013 Human gut microbiome and  
774 risk for colorectal cancer. *Journal of the National Cancer Institute* 105: 1907-  
775 1911.

776 Battaglioli, E. J., and P. C. Kashyap, 2018 Chapter 33 - Diet Effects on Gut Microbiome  
777 Composition, Function, and Host Physiology, pp. 755-766 in *Physiology of the*  
778 *Gastrointestinal Tract (Sixth Edition)*, edited by H. M. Said. Academic Press.

779 Belheouane, M., Y. Gupta, S. Künzel, S. Ibrahim and J. F. Baines, 2017 Improved  
780 detection of gene-microbe interactions in the mouse skin microbiota using high-  
781 resolution QTL mapping of 16S rRNA transcripts. *Microbiome* 5: 59.

782 Benjamini, Y., and Y. Hochberg, 1995 Controlling the False Discovery Rate: A Practical  
783 and Powerful Approach to Multiple Testing. *Journal of the Royal Statistical*  
784 *Society. Series B (Methodological)* 57: 289-300.

785 Benson, A. K., S. A. Kelly, R. Legge, F. Ma, S. J. Low *et al.*, 2010 Individuality in gut  
786 microbiota composition is a complex polygenic trait shaped by multiple  
787 environmental and host genetic factors. *Proceedings of the National Academy of*  
788 *Sciences* 107: 18933-18938.

789 Blekhman, R., J. K. Goodrich, K. Huang, Q. Sun, R. Bukowski *et al.*, 2015 Host genetic  
790 variation impacts microbiome composition across human body sites. *Genome*  
791 *Biology* 16: 191.

792 Bonder, M. J., A. Kurilshikov, E. F. Tigchelaar, Z. Mujagic, F. Imhann *et al.*, 2016 The  
793 effect of host genetics on the gut microbiome. *Nature Genetics* 48: 1407.

- 794 Brown, E. M., X. Ke, D. Hitchcock, S. Jeanfavre, J. Avila-Pacheco *et al.*, 2019  
795 *Bacteroides*-derived sphingolipids are critical for maintaining intestinal  
796 homeostasis and symbiosis. *Cell Host & Microbe* 25: 668-680.e667.
- 797 Bubier, J., V. Philip, C. Quince, J. Campbell, Y. Zhou *et al.*, 2018 Systems genetic  
798 discovery of host-microbiome interactions reveals mechanisms of microbial  
799 involvement in disease. *bioRxiv*.
- 800 Camarinha-Silva, A., M. Maushammer, R. Wellmann, M. Vital, S. Preuss *et al.*, 2017  
801 Host Genome Influence on Gut Microbial Composition and Microbial Prediction of  
802 Complex Traits in Pigs. *Genetics* 206: 1637-1644.
- 803 Caporaso, J. G., J. Kuczynski, J. Stombaugh, K. Bittinger, F. D. Bushman *et al.*, 2010  
804 QIIME allows analysis of high-throughput community sequencing data. *Nature*  
805 *methods* 7: 335-336.
- 806 Caporaso, J. G., C. L. Lauber, W. A. Walters, D. Berg-Lyons, C. A. Lozupone *et al.*,  
807 2011 Global patterns of 16S rRNA diversity at a depth of millions of sequences  
808 per sample. *Proceedings of the National Academy of Sciences of the United*  
809 *States of America* 108 Suppl 1: 4516-4522.
- 810 Chen, D., Z. Yang, X. Chen, Y. Huang, B. Yin *et al.*, 2014 The effect of *Lactobacillus*  
811 *rhamnosus* hsryfm 1301 on the intestinal microbiota of a hyperlipidemic rat  
812 model. *BMC complementary and alternative medicine* 14: 386-386.
- 813 Chen, W., F. Liu, Z. Ling, X. Tong and C. Xiang, 2012 Human Intestinal Lumen and  
814 Mucosa-Associated Microbiota in Patients with Colorectal Cancer. *PLOS ONE* 7:  
815 e39743.

- 816 Churchill, G. A., D. M. Gatti, S. C. Munger and K. L. Svenson, 2012 The Diversity  
817 Outbred mouse population. *Mammalian genome : official journal of the*  
818 *International Mammalian Genome Society* 23: 713-718.
- 819 Collaborative Cross Consortium, 2012 The genome architecture of the Collaborative  
820 Cross mouse genetic reference population. *Genetics* 190: 389-401.
- 821 Dash, N. R., G. Khoder, A. M. Nada and M. T. Al Bataineh, 2019 Exploring the impact of  
822 *Helicobacter pylori* on gut microbiome composition. *PLOS ONE* 14: e0218274.
- 823 Davenport, E. R., D. A. Cusanovich, K. Michelini, L. B. Barreiro, C. Ober *et al.*, 2015  
824 Genome-Wide Association Studies of the Human Gut Microbiota. *PLOS ONE* 10:  
825 e0140301.
- 826 Dudek-Wicher, R. K., A. Junka and M. Bartoszewicz, 2018 The influence of antibiotics  
827 and dietary components on gut microbiota. *Prz Gastroenterol* 13: 85-92.
- 828 Durack, J., N. E. Kimes, D. L. Lin, M. Rauch, M. McKean *et al.*, 2018 Delayed gut  
829 microbiota development in high-risk for asthma infants is temporarily modifiable  
830 by *Lactobacillus* supplementation. *Nature Communications* 9: 707.
- 831 Ericsson, A. C., S. Akter, M. M. Hanson, S. B. Busi, T. W. Parker *et al.*, 2015 Differential  
832 susceptibility to colorectal cancer due to naturally occurring gut microbiota.  
833 *Oncotarget* 6: 33689-33704.
- 834 Fava, F., J. Lovegrove, R. Gitau, K. Jackson and K. Tuohy, 2006 The gut microbiota  
835 and lipid metabolism: implications for human health and coronary heart disease.  
836 *Current medicinal chemistry* 13: 3005-3021.

- 837 Fernández, M. F., I. Reina-Pérez, J. M. Astorga, A. Rodríguez-Carrillo, J. Plaza-Díaz *et*  
838 *al.*, 2018 Breast Cancer and Its Relationship with the Microbiota. *International*  
839 *journal of environmental research and public health* 15: 1747.
- 840 Francino, M. P., 2016 Antibiotics and the Human Gut Microbiome: Dysbioses and  
841 Accumulation of Resistances. *Frontiers in Microbiology* 6.
- 842 Gao, C., B. P. Ganesh, Z. Shi, R. R. Shah, R. Fultz *et al.*, 2017 Gut Microbe-Mediated  
843 Suppression of Inflammation-Associated Colon Carcinogenesis by Luminal  
844 Histamine Production. *The American Journal of Pathology* 187: 2323-2336.
- 845 Garrett, W. S., J. I. Gordon and L. H. Glimcher, 2010 Homeostasis and inflammation in  
846 the intestine. *Cell* 140: 859-870.
- 847 Gatti, D. M., K. L. Svenson, A. Shabalina, L.-Y. Wu, W. Valdar *et al.*, 2014 Quantitative  
848 trait locus mapping methods for diversity outbred mice. *G3 (Bethesda, Md.)* 4:  
849 1623-1633.
- 850 Ghazalpour, A., I. Cespedes, B. J. Bennett and H. Allayee, 2016 Expanding role of gut  
851 microbiota in lipid metabolism. *Current opinion in lipidology* 27: 141-147.
- 852 Goodrich, J. K., E. R. Davenport, M. Beaumont, M. A. Jackson, R. Knight *et al.*, 2016  
853 Genetic Determinants of the Gut Microbiome in UK Twins. *Cell host & microbe*  
854 19: 731-743.
- 855 Goodrich, J. K., E. R. Davenport, A. G. Clark and R. E. Ley, 2017 The Relationship  
856 Between the Human Genome and Microbiome Comes into View. *Annual review*  
857 *of genetics* 51: 413-433.

- 858 Goodrich, Julia K., Jillian L. Waters, Angela C. Poole, Jessica L. Sutter, O. Koren *et al.*,  
859 2014 Human Genetics Shape the Gut Microbiome. *Cell* 159: 789-799.
- 860 Heaver, S. L., E. L. Johnson and R. E. Ley, 2018 Sphingolipids in host–microbial  
861 interactions. *Current Opinion in Microbiology* 43: 92-99.
- 862 Hughes, D. A., R. Bacigalupe, J. Wang, M. C. Rühlemann, R. Y. Tito *et al.*, 2020  
863 Genome-wide associations of human gut microbiome variation and implications  
864 for causal inference analyses. *Nature Microbiology*.
- 865 Igartua, C., E. R. Davenport, Y. Gilad, D. L. Nicolae, J. Pinto *et al.*, 2017 Host genetic  
866 variation in mucosal immunity pathways influences the upper airway microbiome.  
867 *Microbiome* 5: 16.
- 868 Johnson, E. L., S. L. Heaver, J. L. Waters, B. I. Kim, A. Bretin *et al.*, 2019 Sphingolipid  
869 production by gut Bacteroidetes regulates glucose homeostasis. *bioRxiv*:  
870 632877.
- 871 Kang, H. M., J. H. Sul, S. K. Service, N. A. Zaitlen, S.-y. Kong *et al.*, 2010 Variance  
872 component model to account for sample structure in genome-wide association  
873 studies. *Nature Genetics* 42: 348.
- 874 Kemis, J. H., V. Linke, K. L. Barrett, F. J. Boehm, L. L. Traeger *et al.*, 2019 Genetic  
875 determinants of gut microbiota composition and bile acid profiles in mice. *PLOS*  
876 *Genetics* 15: e1008073.
- 877 Kim, J. E., and H. S. Kim, 2019 Microbiome of the Skin and Gut in Atopic Dermatitis  
878 (AD): Understanding the Pathophysiology and Finding Novel Management  
879 Strategies. *Journal of clinical medicine* 8: 444.



- 880 Knox, N. C., J. D. Forbes, G. Van Domselaar and C. N. Bernstein, 2019 The Gut  
881 Microbiome as a Target for IBD Treatment: Are We There Yet? *Curr Treat*  
882 *Options Gastroenterol* 17: 115-126.
- 883 Kurilshikov, A., C. Medina-Gomez, R. Bacigalupe, D. Radjabzadeh, J. Wang *et al.*, 2020  
884 Genetics of human gut microbiome composition. *bioRxiv*:  
885 2020.2006.2026.173724.
- 886 Leamy, L. J., S. A. Kelly, J. Nietfeldt, R. M. Legge, F. Ma *et al.*, 2014 Host genetics and  
887 diet, but not immunoglobulin A expression, converge to shape compositional  
888 features of the gut microbiome in an advanced intercross population of mice.  
889 *Genome biology* 15: 552-552.
- 890 Ley, R. E., F. Bäckhed, P. Turnbaugh, C. A. Lozupone, R. D. Knight *et al.*, 2005 Obesity  
891 alters gut microbial ecology. *Proceedings of the National Academy of Sciences of*  
892 *the United States of America* 102: 11070-11075.
- 893 Lim, M. Y., H. J. You, H. S. Yoon, B. Kwon, J. Y. Lee *et al.*, 2017 The effect of  
894 heritability and host genetics on the gut microbiota and metabolic syndrome. *Gut*  
895 66: 1031.
- 896 Malla, M. A., A. Dubey, A. Kumar, S. Yadav, A. Hashem *et al.*, 2019 Exploring the  
897 Human Microbiome: The Potential Future Role of Next-Generation Sequencing in  
898 Disease Diagnosis and Treatment. *Frontiers in Immunology* 9.
- 899 McFarland, L. V., C. T. Evans and E. J. C. Goldstein, 2018 Strain-Specificity and  
900 Disease-Specificity of Probiotic Efficacy: A Systematic Review and Meta-  
901 Analysis. *Frontiers in medicine* 5: 124-124.

- 902 McKnite, A. M., M. E. Perez-Munoz, L. Lu, E. G. Williams, S. Brewer *et al.*, 2012 Murine  
903 Gut Microbiota Is Defined by Host Genetics and Modulates Variation of Metabolic  
904 Traits. PLOS ONE 7: e39191.
- 905 McMurdie, P. J., and S. Holmes, 2014 Waste Not, Want Not: Why Rarefying  
906 Microbiome Data Is Inadmissible. PLOS Computational Biology 10: e1003531.
- 907 Miles, C. M., and M. Wayne, 2008 Quantitative trait locus (QTL) analysis. Nature  
908 Education 1: 208.
- 909 Müller, M. J., C. Geisler, J. Blundell, A. Dulloo, Y. Schutz *et al.*, 2018 The case of  
910 GWAS of obesity: does body weight control play by the rules? International  
911 Journal of Obesity 42: 1395-1405.
- 912 O'Connor, A., P. M. Quizon, J. E. Albright, F. T. Lin and B. J. Bennett, 2014  
913 Responsiveness of cardiometabolic-related microbiota to diet is influenced by  
914 host genetics. Mammalian genome : official journal of the International  
915 Mammalian Genome Society 25: 583-599.
- 916 Org, E., B. W. Parks, J. W. J. Joo, B. Emert, W. Schwartzman *et al.*, 2015 Genetic and  
917 environmental control of host-gut microbiota interactions. Genome research 25:  
918 1558-1569.
- 919 Ottman, N., J. Reunanen, M. Meijerink, T. E. Pietilä, V. Kainulainen *et al.*, 2017 Pili-like  
920 proteins of *Akkermansia muciniphila* modulate host immune responses and gut  
921 barrier function. PLOS ONE 12: e0173004.
- 922 Pascal, M., M. Perez-Gordo, T. Caballero, M. M. Escribese, M. N. Lopez Longo *et al.*,  
923 2018 Microbiome and Allergic Diseases. Frontiers in immunology 9: 1584-1584.

- 924 Proctor, L., J. LoTempio, A. Marquitz, P. Daschner, D. Xi *et al.*, 2019 A review of 10  
925 years of human microbiome research activities at the US National Institutes of  
926 Health, Fiscal Years 2007-2016. *Microbiome* 7: 31.
- 927 Ridaura, V. K., J. J. Faith, F. E. Rey, J. Cheng, A. E. Duncan *et al.*, 2013 Gut microbiota  
928 from twins discordant for obesity modulate metabolism in mice. *Science* (New  
929 York, N.Y.) 341: 1241214-1241214.
- 930 Rideout, J. R., Y. He, J. A. Navas-Molina, W. A. Walters, L. K. Ursell *et al.*, 2014  
931 Subsampled open-reference clustering creates consistent, comprehensive OTU  
932 definitions and scales to billions of sequences. *PeerJ* 2: e545-e545.
- 933 Rothschild, D., O. Weissbrod, E. Barkan, A. Kurilshikov, T. Korem *et al.*, 2018  
934 Environment dominates over host genetics in shaping human gut microbiota.  
935 *Nature* 555: 210.
- 936 Round, J. L., and S. K. Mazmanian, 2009 The gut microbiota shapes intestinal immune  
937 responses during health and disease. *Nature reviews. Immunology* 9: 313-323.
- 938 Scheipl, F., S. Greven and H. Küchenhoff, 2008 Size and power of tests for a zero  
939 random effect variance or polynomial regression in additive and linear mixed  
940 models. *Computational Statistics & Data Analysis* 52: 3283-3299.
- 941 Shah, M. S., T. Z. DeSantis, T. Weinmaier, P. J. McMurdie, J. L. Cope *et al.*, 2018  
942 Leveraging sequence-based faecal microbial community survey data to identify a  
943 composite biomarker for colorectal cancer. *Gut* 67: 882.

- 944 Shin, J., S. Lee, M.-J. Go, S. Y. Lee, S. C. Kim *et al.*, 2016 Analysis of the mouse gut  
945 microbiome using full-length 16S rRNA amplicon sequencing. *Scientific Reports*  
946 6: 29681.
- 947 Snijders, A. M., S. A. Langlely, Y.-M. Kim, C. J. Brislawn, C. Noecker *et al.*, 2016  
948 Influence of early life exposure, host genetics and diet on the mouse gut  
949 microbiome and metabolome. *Nature Microbiology* 2: 16221.
- 950 Speakman, J. R., R. J. F. Loos, S. O’Rahilly, J. N. Hirschhorn and D. B. Allison, 2018  
951 GWAS for BMI: a treasure trove of fundamental insights into the genetic basis of  
952 obesity. *International Journal of Obesity* 42: 1524-1531.
- 953 Svenson, K. L., D. M. Gatti, W. Valdar, C. E. Welsh, R. Cheng *et al.*, 2012 High-  
954 Resolution Genetic Mapping Using the Mouse Diversity Outbred Population.  
955 *Genetics* 190: 437-447.
- 956 Turnbaugh, P. J., 2017 Microbes and Diet-Induced Obesity: Fast, Cheap, and Out of  
957 Control. *Cell host & microbe* 21: 278-281.
- 958 Turnbaugh, P. J., M. Hamady, T. Yatsunencko, B. L. Cantarel, A. Duncan *et al.*, 2009 A  
959 core gut microbiome in obese and lean twins. *Nature* 457: 480-484.
- 960 Turpin, W., O. Espin-Garcia, W. Xu, M. S. Silverberg, D. Kevans *et al.*, 2016  
961 Association of host genome with intestinal microbial composition in a large  
962 healthy cohort. *Nature Genetics* 48: 1413-1417.
- 963 Uusitalo, U., X. Liu, J. Yang, C. A. Aronsson, S. Hummel *et al.*, 2016 Association of  
964 Early Exposure of Probiotics and Islet Autoimmunity in the TEDDY Study. *JAMA*  
965 *Pediatr* 170: 20-28.

- 966 Veiga, P., C. A. Gallini, C. Beal, M. Michaud, M. L. Delaney *et al.*, 2010 *Bifidobacterium*  
967 *animalis* subsp. *lactis* fermented milk product reduces inflammation by altering a  
968 niche for colitogenic microbes. *Proceedings of the National Academy of Sciences*  
969 *of the United States of America* 107: 18132-18137.
- 970 Vorobyev, A., Y. Gupta, T. Sezin, H. Koga, Y. C. Bartsch *et al.*, 2019 Gene-diet  
971 interactions associated with complex trait variation in an advanced intercross  
972 outbred mouse line. *Nature Communications* 10: 4097.
- 973 Wang, J., S. Kalyan, N. Steck, L. M. Turner, B. Harr *et al.*, 2015 Analysis of intestinal  
974 microbiota in hybrid house mice reveals evolutionary divergence in a vertebrate  
975 hologenome. *Nature Communications* 6: 6440.
- 976 Wang, J., L. B. Thingholm, J. Skiecevičienė, P. Rausch, M. Kummen *et al.*, 2016  
977 Genome-wide association analysis identifies variation in vitamin D receptor and  
978 other host factors influencing the gut microbiota. *Nature genetics* 48: 1396-1406.
- 979 Weiss, S., Z. Z. Xu, S. Peddada, A. Amir, K. Bittinger *et al.*, 2017 Normalization and  
980 microbial differential abundance strategies depend upon data characteristics.  
981 *Microbiome* 5: 27.
- 982 Wen, L., R. E. Ley, P. Y. Volchkov, P. B. Stranges, L. Avanesyan *et al.*, 2008 Innate  
983 immunity and intestinal microbiota in the development of Type 1 diabetes. *Nature*  
984 455: 1109-1113.
- 985 Xu, J., J.-J. Peng, W. Yang, K. Fu and Y. Zhang, 2020 Vaginal microbiomes and  
986 ovarian cancer: a review. *American journal of cancer research* 10: 743-756.

- 987 Yang, J., Q. Tan, Q. Fu, Y. Zhou, Y. Hu *et al.*, 2017 Gastrointestinal microbiome and  
988 breast cancer: correlations, mechanisms and potential clinical implications.  
989 Breast Cancer 24: 220-228.
- 990 Yu, L.-X., and R. F. Schwabe, 2017 The gut microbiome and liver cancer: mechanisms  
991 and clinical translation. Nature Reviews Gastroenterology & Hepatology 14: 527-  
992 539.
- 993 Zackular, J. P., M. A. M. Rogers, M. T. Ruffin and P. D. Schloss, 2014 The Human Gut  
994 Microbiome as a Screening Tool for Colorectal Cancer. Cancer Prevention  
995 Research 7: 1112.
- 996 Zhai, R., X. Xue, L. Zhang, X. Yang, L. Zhao *et al.*, 2019 Strain-Specific Anti-  
997 inflammatory Properties of Two Akkermansia muciniphila Strains on Chronic  
998 Colitis in Mice. Frontiers in Cellular and Infection Microbiology 9.
- 999 Zhu, J., M. Liao, Z. Yao, W. Liang, Q. Li *et al.*, 2018 Breast cancer in postmenopausal  
1000 women is associated with an altered gut metagenome. Microbiome 6: 136.
- 1001 Ziyatdinov, A., M. Vázquez-Santiago, H. Brunel, A. Martinez-Perez, H. Aschard *et al.*,  
1002 2018 lme4qtl: linear mixed models with flexible covariance structure for genetic  
1003 studies of related individuals. BMC bioinformatics 19: 68-68.
